# Supplementary material for: Behavioral Mapping of Multisensory Experience and Engagement in Accessible Gardens: A Case Study of Xuanwu Lake Park, Nanjing
Source: Research Square preprint supplement (doi:10.21203/rs.3.rs-8447827/v1), 2026-02-11
Supplement: Supplementary file 1 [file e3ec371515424d44ee6fd4c4.xlsx]

## Sheet: Sheet1
序号	1、点位	2、性别	3、年龄	4、状态	5、行动障碍	6、时间	7、行为
1	15	女	老年人	独自出行	无限制	上午9:00-13:00	V 与花园保持一段时间的接触，锻炼，通过每一处设施，敲击感官设施等行为〖做太极〗
2	4┋16	男	老年人	独自出行	无限制	上午9:00-13:00	IV 在花园短暂停留，四处观望，闻香，触摸等〖停留，倚靠栏杆，看湖景〗
3	4	男	老年人	结伴出行	无限制	(空)	III 有进入花园的意图，但只是认为比较安静，休憩聊天〖坐在椅子上聊天〗
4	4	女	老年人	结伴出行	无限制	上午9:00-13:00	III 有进入花园的意图，但只是认为比较安静，休憩聊天〖坐在椅子上聊天〗
5	2	女	成年人	独自出行	无限制	上午9:00-13:00	IV 在花园短暂停留，四处观望，闻香，触摸等〖8.54-面向花园吹竖笛〗
6	5	女	成年人	独自出行	无限制	上午9:00-13:00	IV 在花园短暂停留，四处观望，闻香，触摸等〖拍照〗
7	2	男	老年人	独自出行	无限制	上午9:00-13:00	III 有进入花园的意图，但只是认为比较安静，休憩聊天〖在花园里找了一出僻静的地方打电话，靠近2点位〗
8	15	女	成年人	独自出行	无限制	上午9:00-13:00	V 与花园保持一段时间的接触，锻炼，通过每一处设施，敲击感官设施等行为〖打太极停留〗
9	16	女	老年人	独自出行	无限制	上午9:00-13:00	IV 在花园短暂停留，四处观望，闻香，触摸等〖拍摄喷泉照片-8.56〗
10	6┋7┋8	男	儿童	结伴出行	婴儿车	上午9:00-13:00	II 散步等，没有与花园设施接触
11	15	女	老年人	结伴出行	无限制	上午9:00-13:00	II 散步等，没有与花园设施接触〖简单散步〗
12	6┋7┋8	男	成年人	结伴出行	无限制	上午9:00-13:00	II 散步等，没有与花园设施接触
13	15	男	成年人	结伴出行	婴儿车	上午9:00-13:00	V 与花园保持一段时间的接触，锻炼，通过每一处设施，敲击感官设施等行为
14	7	女〖3〗	成年人	结伴出行	无限制	上午9:00-13:00	IV 在花园短暂停留，四处观望，闻香，触摸等〖拍照〗
15	6┋7┋8	女〖2〗	成年人	结伴出行	无限制	上午9:00-13:00	II 散步等，没有与花园设施接触
16	6┋7┋8	男〖3〗	成年人	结伴出行	无限制	上午9:00-13:00	II 散步等，没有与花园设施接触
17	13┋14┋15	男〖3〗	成年人	结伴出行	无限制	上午9:00-13:00	IV 在花园短暂停留，四处观望，闻香，触摸等
18	9	男	老年人	独自出行	无限制	上午9:00-13:00	I 用最短路径穿过花园，没有视线交流
19	14	女	成年人	结伴出行	无限制	上午9:00-13:00	IV 在花园短暂停留，四处观望，闻香，触摸等
20	4┋16	男	老年人	独自出行	无限制	上午9:00-13:00	IV 在花园短暂停留，四处观望，闻香，触摸等〖坐在4点位座椅上望向湖景〗
21	5	女〖5〗	老年人	结伴出行	无限制	上午9:00-13:00	IV 在花园短暂停留，四处观望，闻香，触摸等〖拍照〗
22	8	女	老年人	独自出行	无限制	上午9:00-13:00	V 与花园保持一段时间的接触，锻炼，通过每一处设施，敲击感官设施等行为〖拍照 拍花〗
23	5	男	老年人	结伴出行	无限制	上午9:00-13:00	IV 在花园短暂停留，四处观望，闻香，触摸等〖拍照〗
24	12	男	成年人	独自出行	无限制	上午9:00-13:00	I 用最短路径穿过花园，没有视线交流
25	6┋7┋8	男	成年人	独自出行	无限制	上午9:00-13:00	I 用最短路径穿过花园，没有视线交流
26	5	男	老年人	结伴出行	手账	上午9:00-13:00	IV 在花园短暂停留，四处观望，闻香，触摸等〖拍照〗
27	6┋7┋8	男	老年人	独自出行	无限制	上午9:00-13:00	II 散步等，没有与花园设施接触
28	2	男	成年人	结伴出行	无限制	上午9:00-13:00	I 用最短路径穿过花园，没有视线交流〖通行〗
29	12┋13┋15	女	老年人	独自出行	无限制	上午9:00-13:00	V 与花园保持一段时间的接触，锻炼，通过每一处设施，敲击感官设施等行为
30	9	女	老年人	独自出行	无限制	上午9:00-13:00	IV 在花园短暂停留，四处观望，闻香，触摸等〖拍照〗
31	2	女	成年人	结伴出行	无限制	上午9:00-13:00	I 用最短路径穿过花园，没有视线交流〖通行〗
32	5	女	老年人	结伴出行	轮椅	上午9:00-13:00	II 散步等，没有与花园设施接触
33	5	女〖2〗	成年人	结伴出行	无限制	上午9:00-13:00	II 散步等，没有与花园设施接触
34	11┋12┋13	男	老年人	独自出行	无限制	上午9:00-13:00	II 散步等，没有与花园设施接触
35	9	女	老年人	独自出行	无限制	上午9:00-13:00	IV 在花园短暂停留，四处观望，闻香，触摸等〖拍照〗
36	5	女	老年人	结伴出行	手账	上午9:00-13:00	II 散步等，没有与花园设施接触
37	10	女	老年人	独自出行	无限制	上午9:00-13:00	V 与花园保持一段时间的接触，锻炼，通过每一处设施，敲击感官设施等行为〖舞剑〗
38	5	男	老年人	结伴出行	无限制	上午9:00-13:00	II 散步等，没有与花园设施接触
39	5	男	老年人	结伴出行	无限制	上午9:00-13:00	II 散步等，没有与花园设施接触
40	2	男	成年人	独自出行	无限制	上午9:00-13:00	II 散步等，没有与花园设施接触〖慢速散步，在2附近穿出花园〗
41	5	女〖3〗	老年人	结伴出行	无限制	上午9:00-13:00	II 散步等，没有与花园设施接触
42	10	女	老年人	结伴出行	无限制	上午9:00-13:00	V 与花园保持一段时间的接触，锻炼，通过每一处设施，敲击感官设施等行为〖捡果子〗
43	6┋7┋8	男	成年人	独自出行	无限制	上午9:00-13:00	II 散步等，没有与花园设施接触
44	2	男	老年人	独自出行	无限制	上午9:00-13:00	II 散步等，没有与花园设施接触〖在2点位附近穿越花园，眼神望向3、4点位等处〗
45	5	男〖2〗	老年人	结伴出行	无限制	上午9:00-13:00	IV 在花园短暂停留，四处观望，闻香，触摸等〖拍照〗
46	5	女〖2〗	老年人	结伴出行	无限制	上午9:00-13:00	II 散步等，没有与花园设施接触
47	10	男〖交流 捡果子〗	老年人	结伴出行	无限制	上午9:00-13:00	V 与花园保持一段时间的接触，锻炼，通过每一处设施，敲击感官设施等行为〖捡果子〗
48	6┋7┋8	女	老年人	独自出行	无限制	上午9:00-13:00	II 散步等，没有与花园设施接触
49	6┋7┋8┋9	男〖2〗	青少年	结伴出行	无限制	上午9:00-13:00	II 散步等，没有与花园设施接触
50	10	男	成年人	结伴出行	无限制	上午9:00-13:00	I 用最短路径穿过花园，没有视线交流
51	5	男	儿童	结伴出行	婴儿车	上午9:00-13:00	II 散步等，没有与花园设施接触
52	5	女〖2〗	老年人	结伴出行	无限制	上午9:00-13:00	IV 在花园短暂停留，四处观望，闻香，触摸等
53	10	男	老年人	独自出行	无限制	上午9:00-13:00	IV 在花园短暂停留，四处观望，闻香，触摸等〖休憩 坐着观看〗
54	6┋7┋8	男	成年人	结伴出行	无限制	上午9:00-13:00	I 用最短路径穿过花园，没有视线交流
55	6┋7┋8	女	成年人	结伴出行	无限制	上午9:00-13:00	I 用最短路径穿过花园，没有视线交流
56	11	男	成年人	结伴出行	无限制	上午9:00-13:00	I 用最短路径穿过花园，没有视线交流
57	5	女	老年人	结伴出行	轮椅	上午9:00-13:00	II 散步等，没有与花园设施接触
58	11	女	成年人	结伴出行	无限制	上午9:00-13:00	I 用最短路径穿过花园，没有视线交流
59	5	女〖3〗	成年人	结伴出行	无限制	上午9:00-13:00	IV 在花园短暂停留，四处观望，闻香，触摸等〖拍照〗
60	2┋3	女	成年人	独自出行	无限制	上午9:00-13:00	IV 在花园短暂停留，四处观望，闻香，触摸等〖年轻女子，在鸟类科普基地观望，查看科普信息〗
61	5	男	老年人	独自出行	(空)	上午9:00-13:00	II 散步等，没有与花园设施接触
62	3	男	老年人	独自出行	无限制	上午9:00-13:00	I 用最短路径穿过花园，没有视线交流〖一边玩手机一边通行〗
63	6┋7┋8	女	老年人	独自出行	无限制	上午9:00-13:00	II 散步等，没有与花园设施接触
64	5	男	老年人	独自出行	无限制	上午9:00-13:00	IV 在花园短暂停留，四处观望，闻香，触摸等〖拍照〗
65	10┋13	男	老年人	独自出行	无限制	上午9:00-13:00	III 有进入花园的意图，但只是认为比较安静，休憩聊天
66	6┋7┋8	男	成年人	独自出行	无限制	上午9:00-13:00	I 用最短路径穿过花园，没有视线交流
67	4	女	老年人	独自出行	无限制	上午9:00-13:00	V 与花园保持一段时间的接触，锻炼，通过每一处设施，敲击感官设施等行为〖在鸟类科普基地架上手机跟着锻炼-9.13〗
68	5	女〖2〗	老年人	独自出行	无限制	上午9:00-13:00	II 散步等，没有与花园设施接触
69	7	女	老年人	(空)	无限制	上午9:00-13:00	IV 在花园短暂停留，四处观望，闻香，触摸等〖拍照〗
70	11┋12	男	成年人	独自出行	无限制	上午9:00-13:00	I 用最短路径穿过花园，没有视线交流
71	8	女	老年人	独自出行	无限制	上午9:00-13:00	IV 在花园短暂停留，四处观望，闻香，触摸等〖拍照〗
72	5	女	老年人	结伴出行	无限制	上午9:00-13:00	III 有进入花园的意图，但只是认为比较安静，休憩聊天〖聊天〗
73	2	男	老年人	结伴出行	无限制	上午9:00-13:00	V 与花园保持一段时间的接触，锻炼，通过每一处设施，敲击感官设施等行为〖带孩子〗
74	2	男	儿童	结伴出行	无限制	上午9:00-13:00	V 与花园保持一段时间的接触，锻炼，通过每一处设施，敲击感官设施等行为〖观察感知，特别是在2点位座椅附近玩〗
75	5	男	老年人	独自出行	无限制	上午9:00-13:00	IV 在花园短暂停留，四处观望，闻香，触摸等
76	5	女	老年人	结伴出行	无限制	上午9:00-13:00	IV 在花园短暂停留，四处观望，闻香，触摸等〖拍照〗
77	2	男〖*3〗	成年人	结伴出行	无限制	上午9:00-13:00	I 用最短路径穿过花园，没有视线交流〖快速穿行，一边穿行一边打手机〗
78	3	女	(空)	独自出行	无限制	上午9:00-13:00	III 有进入花园的意图，但只是认为比较安静，休憩聊天〖慢速散步，眼睛看科普信息〗
79	6┋7┋8	女	老年人	结伴出行	无限制	上午9:00-13:00	IV 在花园短暂停留，四处观望，闻香，触摸等〖拍照〗
80	12┋14	男	老年人	独自出行	无限制	上午9:00-13:00	V 与花园保持一段时间的接触，锻炼，通过每一处设施，敲击感官设施等行为〖四处观看 拍照〗
81	9	女	老年人	结伴出行	无限制	上午9:00-13:00	IV 在花园短暂停留，四处观望，闻香，触摸等〖拍照〗
82	6┋7┋8┋9	男	老年人	结伴出行	无限制	上午9:00-13:00	II 散步等，没有与花园设施接触
83	4┋16	女	老年人	独自出行	无限制	上午9:00-13:00	V 与花园保持一段时间的接触，锻炼，通过每一处设施，敲击感官设施等行为〖对着湖景拍照；将手机架着直播〗
84	5	男〖4〗	儿童	结伴出行	婴儿车	上午9:00-13:00	II 散步等，没有与花园设施接触
85	3	男	成年人	结伴出行	无限制	上午9:00-13:00	IV 在花园短暂停留，四处观望，闻香，触摸等〖查看鸟类科普教育信息〗
86	5	男〖2〗	成年人	结伴出行	无限制	上午9:00-13:00	II 散步等，没有与花园设施接触
87	5	女〖2〗	成年人	结伴出行	无限制	上午9:00-13:00	II 散步等，没有与花园设施接触
88	3	女	成年人	结伴出行	无限制	上午9:00-13:00	II 散步等，没有与花园设施接触〖陪伴看科普信息的男士，但在玩手机〗
89	11	男	老年人	结伴出行	无限制	上午9:00-13:00	IV 在花园短暂停留，四处观望，闻香，触摸等
90	6┋7┋8	女〖2〗	成年人	独自出行	无限制	上午9:00-13:00	II 散步等，没有与花园设施接触
91	8	男	成年人	独自出行	无限制	上午9:00-13:00	V 与花园保持一段时间的接触，锻炼，通过每一处设施，敲击感官设施等行为〖听sts〗
92	5	女	成年人	结伴出行	无限制	上午9:00-13:00	IV 在花园短暂停留，四处观望，闻香，触摸等
93	3┋16	男	成年人	独自出行	无限制	上午9:00-13:00	IV 在花园短暂停留，四处观望，闻香，触摸等〖偶尔注意鸟类科普信息，观望湖景〗
94	9	(空)	成年人	独自出行	无限制	上午9:00-13:00	IV 在花园短暂停留，四处观望，闻香，触摸等
95	6┋7┋8┋9	男	成年人	独自出行	无限制	上午9:00-13:00	I 用最短路径穿过花园，没有视线交流
96	5	女〖2〗	成年人	结伴出行	无限制	上午9:00-13:00	III 有进入花园的意图，但只是认为比较安静，休憩聊天
97	2	男	老年人	结伴出行	无限制	上午9:00-13:00	III 有进入花园的意图，但只是认为比较安静，休憩聊天〖清洁工在花园附近做清洁，在2点位附近停下来坐着聊天〗
98	2	女	老年人	结伴出行	无限制	上午9:00-13:00	III 有进入花园的意图，但只是认为比较安静，休憩聊天〖和休息的清洁工聊天〗
99	4	男	成年人	独自出行	无限制	上午9:00-13:00	III 有进入花园的意图，但只是认为比较安静，休憩聊天〖冥想沉思，来回踱步〗
100	5	女〖2〗	成年人	结伴出行	无限制	上午9:00-13:00	II 散步等，没有与花园设施接触
101	5	男	儿童	结伴出行	婴儿车	上午9:00-13:00	II 散步等，没有与花园设施接触
102	2	女	老年人	独自出行	无限制	上午9:00-13:00	III 有进入花园的意图，但只是认为比较安静，休憩聊天〖打太极〗
103	6┋7┋8	男	成年人	独自出行	无限制	上午9:00-13:00	II 散步等，没有与花园设施接触
104	15	男	成年人	独自出行	无限制	上午9:00-13:00	V 与花园保持一段时间的接触，锻炼，通过每一处设施，敲击感官设施等行为〖敲击音乐鼓〗
105	3	男	老年人	独自出行	无限制	上午9:00-13:00	IV 在花园短暂停留，四处观望，闻香，触摸等〖戴墨镜的老爷爷，感觉有一些视力障碍，步履蹒跚，在鸟类科普信息前停下来拍摄鸟类科普信息〗
106	3	男	老年人	独自出行	无限制	上午9:00-13:00	IV 在花园短暂停留，四处观望，闻香，触摸等〖清洁工，停下来休息，但是动作比较奇怪，不好判断-9.33〗
107	2	女〖二女一男；总共3人〗	老年人	结伴出行	无限制	上午9:00-13:00	III 有进入花园的意图，但只是认为比较安静，休憩聊天〖坐在椅子上聊天〗
108	14	男	成年人	独自出行	无限制	上午9:00-13:00	II 散步等，没有与花园设施接触
109	5	女	成年人	结伴出行	无限制	上午9:00-13:00	IV 在花园短暂停留，四处观望，闻香，触摸等〖拍照〗
110	10┋11	男	老年人	独自出行	无限制	上午9:00-13:00	II 散步等，没有与花园设施接触
111	6┋7┋8┋9	男	老年人	独自出行	无限制	上午9:00-13:00	II 散步等，没有与花园设施接触
112	6┋7┋8┋9	男	老年人	结伴出行	无限制	上午9:00-13:00	II 散步等，没有与花园设施接触
113	4	女	老年人	结伴出行	无限制	上午9:00-13:00	V 与花园保持一段时间的接触，锻炼，通过每一处设施，敲击感官设施等行为〖脚靠在栏杆上锻炼〗
114	6┋7┋8┋9	女	老年人	结伴出行	无限制	上午9:00-13:00	IV 在花园短暂停留，四处观望，闻香，触摸等
115	4	女	老年人	结伴出行	无限制	上午9:00-13:00	V 与花园保持一段时间的接触，锻炼，通过每一处设施，敲击感官设施等行为〖锻炼，打太极，两个老太太做的运动动作不一样〗
116	6┋7┋8	男	成年人	独自出行	无限制	上午9:00-13:00	II 散步等，没有与花园设施接触
117	9	女	老年人	结伴出行	无限制	上午9:00-13:00	III 有进入花园的意图，但只是认为比较安静，休憩聊天
118	3	(空)	老年人	独自出行	无限制	上午9:00-13:00	II 散步等，没有与花园设施接触〖缓慢散步，并没有关注周边的设施情况〗
119	6┋7┋8	女〖2〗	老年人	结伴出行	无限制	上午9:00-13:00	II 散步等，没有与花园设施接触
120	9	女	老年人	结伴出行	无限制	上午9:00-13:00	IV 在花园短暂停留，四处观望，闻香，触摸等
121	15	男	成年人	独自出行	无限制	上午9:00-13:00	V 与花园保持一段时间的接触，锻炼，通过每一处设施，敲击感官设施等行为〖踩蹦床 触觉感知，赏花〗
122	6┋7┋8	女	老年人	独自出行	无限制	上午9:00-13:00	II 散步等，没有与花园设施接触
123	11┋12┋15	女	老年人	结伴出行	无限制	上午9:00-13:00	V 与花园保持一段时间的接触，锻炼，通过每一处设施，敲击感官设施等行为〖触碰装置 音乐〗
124	9	男	老年人	结伴出行	无限制	上午9:00-13:00	IV 在花园短暂停留，四处观望，闻香，触摸等
125	12┋15	女	老年人	结伴出行	无限制	上午9:00-13:00	V 与花园保持一段时间的接触，锻炼，通过每一处设施，敲击感官设施等行为〖敲击感知〗
126	6┋7┋8	女	成年人	独自出行	无限制	上午9:00-13:00	II 散步等，没有与花园设施接触
127	11	男	老年人	结伴出行	无限制	上午9:00-13:00	II 散步等，没有与花园设施接触
128	11	女	老年人	结伴出行	无限制	上午9:00-13:00	I 用最短路径穿过花园，没有视线交流
129	11	女	老年人	结伴出行	无限制	上午9:00-13:00	I 用最短路径穿过花园，没有视线交流
130	3	男〖一家三口，父母+女儿〗	成年人	结伴出行	无限制	上午9:00-13:00	IV 在花园短暂停留，四处观望，闻香，触摸等〖看鸟类科普信息，看湖景，停留，像是来旅游的。〗
131	14┋15	女	老年人	结伴出行	无限制	上午9:00-13:00	IV 在花园短暂停留，四处观望，闻香，触摸等
132	3	女	老年人	独自出行	无限制	上午9:00-13:00	II 散步等，没有与花园设施接触〖慢速散步〗
133	6┋7┋8	男	老年人	独自出行	无限制	上午9:00-13:00	II 散步等，没有与花园设施接触
134	14┋15	女	老年人	结伴出行	无限制	上午9:00-13:00	V 与花园保持一段时间的接触，锻炼，通过每一处设施，敲击感官设施等行为〖看植物〗
135	6┋7┋8	女	成年人	独自出行	无限制	上午9:00-13:00	II 散步等，没有与花园设施接触
136	3	男	老年人	独自出行	无限制	上午9:00-13:00	III 有进入花园的意图，但只是认为比较安静，休憩聊天〖休息，坐在椅子上抽烟〗
137	15	女	成年人	独自出行	无限制	上午9:00-13:00	II 散步等，没有与花园设施接触
138	4	女〖女性*4 中年人〗	成年人	结伴出行	(空)	上午9:00-13:00	III 有进入花园的意图，但只是认为比较安静，休憩聊天〖靠在栏杆上聊天〗
139	11┋14┋15	女	老年人	独自出行	无限制	上午9:00-13:00	II 散步等，没有与花园设施接触
140	14┋15	男	老年人	独自出行	无限制	上午9:00-13:00	II 散步等，没有与花园设施接触
141	5	女	老年人	结伴出行	无限制	上午9:00-13:00	IV 在花园短暂停留，四处观望，闻香，触摸等〖拍照〗
142	5	女〖2〗	老年人	结伴出行	无限制	上午9:00-13:00	III 有进入花园的意图，但只是认为比较安静，休憩聊天
143	4	男	老年人	独自出行	无限制	上午9:00-13:00	III 有进入花园的意图，但只是认为比较安静，休憩聊天〖缓慢散步，带耳机听音乐，偶尔会看下设施（仅目光接触且不是很频繁）〗
144	3	男	老年人	独自出行	无限制	上午9:00-13:00	II 散步等，没有与花园设施接触〖步数较快的散步，与周围没有接触〗
145	15	男	老年人	结伴出行	无限制	上午9:00-13:00	II 散步等，没有与花园设施接触
146	11┋15	女	成年人	结伴出行	婴儿车	上午9:00-13:00	V 与花园保持一段时间的接触，锻炼，通过每一处设施，敲击感官设施等行为〖给孩子敲击音乐〗
147	5	男〖2〗	老年人	结伴出行	无限制	上午9:00-13:00	IV 在花园短暂停留，四处观望，闻香，触摸等〖拍照〗
148	6┋7┋8	女	老年人	独自出行	无限制	上午9:00-13:00	II 散步等，没有与花园设施接触
149	15	男	儿童	结伴出行	无限制	上午9:00-13:00	V 与花园保持一段时间的接触，锻炼，通过每一处设施，敲击感官设施等行为
150	15	男	老年人	结伴出行	无限制	上午9:00-13:00	II 散步等，没有与花园设施接触
151	7	(空)	老年人	结伴出行	手账	上午9:00-13:00	IV 在花园短暂停留，四处观望，闻香，触摸等〖拍照〗
152	14┋15	男	儿童	结伴出行	无限制	上午9:00-13:00	V 与花园保持一段时间的接触，锻炼，通过每一处设施，敲击感官设施等行为
153	6┋8	男	老年人	结伴出行	手账	上午9:00-13:00	II 散步等，没有与花园设施接触
154	4	男	(空)	结伴出行	无限制	上午9:00-13:00	V 与花园保持一段时间的接触，锻炼，通过每一处设施，敲击感官设施等行为〖跳舞，面向花卉大道〗
155	6┋7┋8	女	成年人	结伴出行	无限制	上午9:00-13:00	IV 在花园短暂停留，四处观望，闻香，触摸等〖拍照〗
156	14┋15	男	儿童	独自出行	无限制	上午9:00-13:00	V 与花园保持一段时间的接触，锻炼，通过每一处设施，敲击感官设施等行为〖触摸语音按钮 蹦床〗
157	4	女〖和男士结伴〗	成年人	结伴出行	无限制	上午9:00-13:00	V 与花园保持一段时间的接触，锻炼，通过每一处设施，敲击感官设施等行为〖跳舞，面向花卉大道-9.59〗
158	6┋7┋8	男	成年人	独自出行	无限制	上午9:00-13:00	I 用最短路径穿过花园，没有视线交流
159	14┋15	男	儿童	结伴出行	无限制	上午9:00-13:00	V 与花园保持一段时间的接触，锻炼，通过每一处设施，敲击感官设施等行为〖敲击 蹦床〗
160	6┋7┋8	男	儿童	结伴出行	无限制	上午9:00-13:00	II 散步等，没有与花园设施接触
161	6┋7┋8	女〖2〗	老年人	结伴出行	无限制	上午9:00-13:00	II 散步等，没有与花园设施接触
162	15	女	成年人	独自出行	无限制	上午9:00-13:00	II 散步等，没有与花园设施接触
163	9	男	青少年	独自出行	无限制	上午9:00-13:00	I 用最短路径穿过花园，没有视线交流
164	15	女	老年人	结伴出行	婴儿车	上午9:00-13:00	III 有进入花园的意图，但只是认为比较安静，休憩聊天
165	6┋7┋8	男	老年人	独自出行	无限制	上午9:00-13:00	I 用最短路径穿过花园，没有视线交流
166	2	女	老年人	独自出行	无限制	上午9:00-13:00	III 有进入花园的意图，但只是认为比较安静，休憩聊天〖在椅子上休息〗
167	15	女	老年人	结伴出行	婴儿车	上午9:00-13:00	III 有进入花园的意图，但只是认为比较安静，休憩聊天
168	2	女〖女学生*2〗	青少年	结伴出行	无限制	上午9:00-13:00	II 散步等，没有与花园设施接触〖边散步边聊天步速较快〗
169	6┋7┋8	女〖2〗	老年人	结伴出行	无限制	上午9:00-13:00	III 有进入花园的意图，但只是认为比较安静，休憩聊天
170	2	女〖女士*2+带娃〗	成年人	结伴出行	婴儿车	上午9:00-13:00	II 散步等，没有与花园设施接触〖仅在2点位散步，然后穿出花园〗
171	13┋15	男	成年人	独自出行	无限制	上午9:00-13:00	III 有进入花园的意图，但只是认为比较安静，休憩聊天
172	6┋7┋8	男	老年人	独自出行	无限制	上午9:00-13:00	II 散步等，没有与花园设施接触
173	2┋16	女〖女士*2〗	成年人	结伴出行	无限制	上午9:00-13:00	IV 在花园短暂停留，四处观望，闻香，触摸等〖拍摄湖景照片〗
174	2	男	老年人	(空)	无限制	上午9:00-13:00	I 用最短路径穿过花园，没有视线交流〖路过2点位〗
175	6┋7┋8	男	成年人	独自出行	无限制	上午9:00-13:00	II 散步等，没有与花园设施接触
176	3	女〖女+儿童〗	成年人	结伴出行	无限制	上午9:00-13:00	V 与花园保持一段时间的接触，锻炼，通过每一处设施，敲击感官设施等行为〖带娃，小孩对鸟类科普一类的声音很感兴趣，喂小孩吃东西，驻足观看〗
177	3	女	老年人	结伴出行	无限制	上午9:00-13:00	IV 在花园短暂停留，四处观望，闻香，触摸等〖缓慢散步，查看鸟类科普〗
178	6┋7┋8	男	成年人	独自出行	无限制	上午9:00-13:00	I 用最短路径穿过花园，没有视线交流
179	3	女〖陪伴老人〗	成年人	结伴出行	无限制	上午9:00-13:00	IV 在花园短暂停留，四处观望，闻香，触摸等〖缓慢散步，老人在查看鸟类科普青年人应该只是陪同〗
180	6┋7┋8	女〖2〗	成年人	结伴出行	无限制	上午9:00-13:00	III 有进入花园的意图，但只是认为比较安静，休憩聊天
181	11┋13┋15	男	老年人	结伴出行	无限制	上午9:00-13:00	II 散步等，没有与花园设施接触
182	6┋7┋8	男	成年人	结伴出行	无限制	上午9:00-13:00	II 散步等，没有与花园设施接触
183	15	男	老年人	独自出行	无限制	上午9:00-13:00	I 用最短路径穿过花园，没有视线交流
184	6┋7┋8	女	成年人	结伴出行	无限制	上午9:00-13:00	II 散步等，没有与花园设施接触
185	11┋13┋15	女	老年人	结伴出行	无限制	上午9:00-13:00	II 散步等，没有与花园设施接触
186	11┋13┋15	女	老年人	结伴出行	无限制	上午9:00-13:00	II 散步等，没有与花园设施接触
187	6┋7┋8	男	成年人	独自出行	无限制	上午9:00-13:00	II 散步等，没有与花园设施接触
188	6┋7┋8	女〖2〗	老年人	结伴出行	无限制	上午9:00-13:00	III 有进入花园的意图，但只是认为比较安静，休憩聊天
189	11	女	老年人	结伴出行	无限制	上午9:00-13:00	I 用最短路径穿过花园，没有视线交流
190	11	女	成年人	结伴出行	无限制	上午9:00-13:00	I 用最短路径穿过花园，没有视线交流
191	6┋7┋8	女	儿童	结伴出行	婴儿车	上午9:00-13:00	II 散步等，没有与花园设施接触
192	6┋7┋8	男	老年人	结伴出行	无限制	上午9:00-13:00	II 散步等，没有与花园设施接触
193	14	女	成年人	结伴出行	(空)	上午9:00-13:00	IV 在花园短暂停留，四处观望，闻香，触摸等〖休憩做动作〗
194	6┋7┋8	女	老年人	结伴出行	无限制	上午9:00-13:00	II 散步等，没有与花园设施接触
195	14┋15	男	老年人	结伴出行	无限制	上午9:00-13:00	IV 在花园短暂停留，四处观望，闻香，触摸等
196	6┋7┋8	(空)	成年人	结伴出行	无限制	上午9:00-13:00	II 散步等，没有与花园设施接触
197	6┋7┋8	男	成年人	结伴出行	无限制	上午9:00-13:00	II 散步等，没有与花园设施接触
198	2	女〖女*3+男*1〗	老年人	结伴出行	无限制	上午9:00-13:00	III 有进入花园的意图，但只是认为比较安静，休憩聊天〖在花卉大道上步行，但是说这个花园很有意思，提到了鸟类科普信息有进入花园的意图，但是只在道路上走〗
199	6┋7┋8	男	成年人	独自出行	无限制	上午9:00-13:00	I 用最短路径穿过花园，没有视线交流
200	5	男〖5〗	儿童	结伴出行	无限制	上午9:00-13:00	IV 在花园短暂停留，四处观望，闻香，触摸等
201	14┋15	女	老年人	结伴出行	无限制	上午9:00-13:00	II 散步等，没有与花园设施接触
202	15	女	儿童	结伴出行	无限制	上午9:00-13:00	V 与花园保持一段时间的接触，锻炼，通过每一处设施，敲击感官设施等行为
203	15	女	儿童	结伴出行	无限制	上午9:00-13:00	V 与花园保持一段时间的接触，锻炼，通过每一处设施，敲击感官设施等行为
204	15	女	儿童	结伴出行	无限制	上午9:00-13:00	V 与花园保持一段时间的接触，锻炼，通过每一处设施，敲击感官设施等行为
205	15	男	老年人	独自出行	无限制	上午9:00-13:00	V 与花园保持一段时间的接触，锻炼，通过每一处设施，敲击感官设施等行为
206	15	女	老年人	结伴出行	无限制	上午9:00-13:00	V 与花园保持一段时间的接触，锻炼，通过每一处设施，敲击感官设施等行为
207	10	男	成年人	结伴出行	无限制	上午9:00-13:00	II 散步等，没有与花园设施接触
208	10┋11	女	老年人	结伴出行	无限制	上午9:00-13:00	II 散步等，没有与花园设施接触
209	15	男	老年人	结伴出行	无限制	上午9:00-13:00	III 有进入花园的意图，但只是认为比较安静，休憩聊天
210	15	男	老年人	结伴出行	无限制	上午9:00-13:00	II 散步等，没有与花园设施接触
211	6┋7┋8	男	儿童	结伴出行	无限制	上午9:00-13:00	II 散步等，没有与花园设施接触
212	2	男〖一男一女〗	老年人	结伴出行	无限制	上午9:00-13:00	IV 在花园短暂停留，四处观望，闻香，触摸等〖观察2点位座椅旁边的植物情况〗
213	6┋7┋8	男	成年人	结伴出行	无限制	上午9:00-13:00	II 散步等，没有与花园设施接触
214	15	女	老年人	独自出行	婴儿车	上午9:00-13:00	IV 在花园短暂停留，四处观望，闻香，触摸等
215	2	男〖一男一女〗	老年人	结伴出行	无限制	上午9:00-13:00	II 散步等，没有与花园设施接触〖快速散步〗
216	14	男	老年人	结伴出行	无限制	上午9:00-13:00	II 散步等，没有与花园设施接触
217	8┋15	男	儿童	结伴出行	无限制	上午9:00-13:00	V 与花园保持一段时间的接触，锻炼，通过每一处设施，敲击感官设施等行为
218	3┋4	男〖一男一女〗	老年人	结伴出行	无限制	上午9:00-13:00	V 与花园保持一段时间的接触，锻炼，通过每一处设施，敲击感官设施等行为〖触摸3点位旁边的木头设施和栅栏，观察湖景，带着小推车（买菜那种）〗
219	15	男	成年人	独自出行	婴儿车	上午9:00-13:00	III 有进入花园的意图，但只是认为比较安静，休憩聊天
220	15	男	老年人	结伴出行	无限制	上午9:00-13:00	III 有进入花园的意图，但只是认为比较安静，休憩聊天
221	6┋7┋8	女	儿童	结伴出行	婴儿车	上午9:00-13:00	II 散步等，没有与花园设施接触
222	4	女	老年人	独自出行	无限制	上午9:00-13:00	V 与花园保持一段时间的接触，锻炼，通过每一处设施，敲击感官设施等行为〖缓慢步行，边步行边锻炼，观察舞者〗
223	6┋7┋8	女	成年人	结伴出行	无限制	上午9:00-13:00	II 散步等，没有与花园设施接触
224	6┋7┋8	男〖2〗	成年人	结伴出行	无限制	上午9:00-13:00	II 散步等，没有与花园设施接触
225	10	男	成年人	结伴出行	无限制	上午9:00-13:00	V 与花园保持一段时间的接触，锻炼，通过每一处设施，敲击感官设施等行为〖躺着休憩〗
226	10	男	老年人	独自出行	无限制	上午9:00-13:00	IV 在花园短暂停留，四处观望，闻香，触摸等
227	6┋7┋8	男〖2〗	儿童	结伴出行	婴儿车	上午9:00-13:00	II 散步等，没有与花园设施接触
228	9	男	儿童	结伴出行	无限制	上午9:00-13:00	II 散步等，没有与花园设施接触
229	14	男	成年人	独自出行	无限制	上午9:00-13:00	I 用最短路径穿过花园，没有视线交流
230	2	女	成年人	独自出行	无限制	上午9:00-13:00	IV 在花园短暂停留，四处观望，闻香，触摸等〖对着湖景拍照〗
231	6┋7┋8┋9	男	成年人	结伴出行	无限制	上午9:00-13:00	II 散步等，没有与花园设施接触
232	6┋7┋8	男	儿童	结伴出行	无限制	上午9:00-13:00	I 用最短路径穿过花园，没有视线交流
233	15	女	成年人	结伴出行	无限制	上午9:00-13:00	V 与花园保持一段时间的接触，锻炼，通过每一处设施，敲击感官设施等行为
234	6┋7┋8	(空)	成年人	结伴出行	无限制	上午9:00-13:00	I 用最短路径穿过花园，没有视线交流
235	15	男	老年人	结伴出行	无限制	上午9:00-13:00	V 与花园保持一段时间的接触，锻炼，通过每一处设施，敲击感官设施等行为
236	6┋7┋8	女	成年人	结伴出行	无限制	上午9:00-13:00	II 散步等，没有与花园设施接触
237	2	男〖一男一女〗	成年人	结伴出行	无限制	上午9:00-13:00	V 与花园保持一段时间的接触，锻炼，通过每一处设施，敲击感官设施等行为〖参观介绍，男士向女士解说无障碍花园设置〗
238	15	男	老年人	独自出行	无限制	上午9:00-13:00	V 与花园保持一段时间的接触，锻炼，通过每一处设施，敲击感官设施等行为
239	6┋7┋8	男	成年人	独自出行	无限制	上午9:00-13:00	II 散步等，没有与花园设施接触
240	15	男	儿童	结伴出行	无限制	上午9:00-13:00	V 与花园保持一段时间的接触，锻炼，通过每一处设施，敲击感官设施等行为
241	6┋7┋8	女〖2〗	成年人	结伴出行	无限制	上午9:00-13:00	III 有进入花园的意图，但只是认为比较安静，休憩聊天
242	12┋14┋15	男	老年人	结伴出行	无限制	上午9:00-13:00	III 有进入花园的意图，但只是认为比较安静，休憩聊天
243	2┋3┋4	男〖一群游客，有导游带讲解〗	成年人	结伴出行	无限制	上午9:00-13:00	V 与花园保持一段时间的接触，锻炼，通过每一处设施，敲击感官设施等行为〖旅行团导游向游客解说介绍，情侣园等景点，提到鸟类科普信息〗
244	6┋7┋8	男	成年人	结伴出行	无限制	上午9:00-13:00	III 有进入花园的意图，但只是认为比较安静，休憩聊天〖聊天〗
245	12┋14┋15	女	成年人	结伴出行	无限制	上午9:00-13:00	III 有进入花园的意图，但只是认为比较安静，休憩聊天
246	6┋7┋8	女〖2〗	成年人	结伴出行	无限制	上午9:00-13:00	III 有进入花园的意图，但只是认为比较安静，休憩聊天
247	6┋7┋8	男〖5〗	成年人	结伴出行	无限制	上午9:00-13:00	II 散步等，没有与花园设施接触
248	4	女	老年人	独自出行	无限制	上午9:00-13:00	IV 在花园短暂停留，四处观望，闻香，触摸等〖坐在椅子上休息，看湖景〗
249	7	男〖2〗	老年人	结伴出行	无限制	上午9:00-13:00	III 有进入花园的意图，但只是认为比较安静，休憩聊天〖聊天〗
250	15	男	老年人	结伴出行	无限制	上午9:00-13:00	V 与花园保持一段时间的接触，锻炼，通过每一处设施，敲击感官设施等行为
251	4	男	老年人	独自出行	无限制	上午9:00-13:00	IV 在花园短暂停留，四处观望，闻香，触摸等〖边走边观察湖景，偶尔也关注到鸟类科普信息〗
252	6┋7┋8	男〖20〗	成年人	结伴出行	无限制	上午9:00-13:00	II 散步等，没有与花园设施接触
253	12┋14┋15	男	老年人	结伴出行	无限制	上午9:00-13:00	V 与花园保持一段时间的接触，锻炼，通过每一处设施，敲击感官设施等行为
254	6┋7┋8	女〖15〗	成年人	结伴出行	无限制	上午9:00-13:00	II 散步等，没有与花园设施接触
255	4	女	老年人	独自出行	无限制	上午9:00-13:00	V 与花园保持一段时间的接触，锻炼，通过每一处设施，敲击感官设施等行为〖靠在栏杆上冥想（不是很好界定）-10.27〗
256	6┋7┋8	男	老年人	结伴出行	无限制	上午9:00-13:00	II 散步等，没有与花园设施接触
257	12┋14┋15	女	成年人	结伴出行	无限制	上午9:00-13:00	V 与花园保持一段时间的接触，锻炼，通过每一处设施，敲击感官设施等行为
258	6┋7┋8	女	成年人	结伴出行	无限制	上午9:00-13:00	II 散步等，没有与花园设施接触
259	11┋12┋14┋15	男〖15个人〗	成年人	结伴出行	无限制	上午9:00-13:00	V 与花园保持一段时间的接触，锻炼，通过每一处设施，敲击感官设施等行为〖旅游团讲解感受盲人花园〗
260	5	女	成年人	结伴出行	无限制	上午9:00-13:00	III 有进入花园的意图，但只是认为比较安静，休憩聊天
261	11┋12┋14┋15	女〖15〗	成年人	(空)	无限制	上午9:00-13:00	V 与花园保持一段时间的接触，锻炼，通过每一处设施，敲击感官设施等行为〖旅游团〗
262	5	男	成年人	结伴出行	无限制	上午9:00-13:00	III 有进入花园的意图，但只是认为比较安静，休憩聊天
263	6┋7┋8	男〖4〗	老年人	结伴出行	无限制	上午9:00-13:00	II 散步等，没有与花园设施接触
264	11┋14┋15	女	老年人	结伴出行	婴儿车	上午9:00-13:00	III 有进入花园的意图，但只是认为比较安静，休憩聊天
265	6┋7┋8	男〖2〗	儿童	结伴出行	婴儿车	上午9:00-13:00	II 散步等，没有与花园设施接触
266	2	女	老年人	独自出行	无限制	上午9:00-13:00	IV 在花园短暂停留，四处观望，闻香，触摸等〖对着湖景喷泉拍照〗
267	14┋15	女	老年人	结伴出行	无限制	上午9:00-13:00	II 散步等，没有与花园设施接触
268	2	男	老年人	独自出行	无限制	上午9:00-13:00	II 散步等，没有与花园设施接触〖缓慢散步，目光基本无接触〗
269	6┋7┋8	男〖2〗	老年人	结伴出行	无限制	上午9:00-13:00	III 有进入花园的意图，但只是认为比较安静，休憩聊天
270	6┋7┋8	女	老年人	独自出行	无限制	上午9:00-13:00	II 散步等，没有与花园设施接触
271	6┋7┋8	女〖2〗	成年人	结伴出行	无限制	上午9:00-13:00	II 散步等，没有与花园设施接触
272	6┋7┋8┋9	男	成年人	独自出行	无限制	上午9:00-13:00	I 用最短路径穿过花园，没有视线交流
273	9	女〖2〗	老年人	结伴出行	无限制	上午9:00-13:00	II 散步等，没有与花园设施接触
274	6┋7┋8┋9	女	老年人	独自出行	无限制	上午9:00-13:00	II 散步等，没有与花园设施接触
275	6┋7┋8	女〖4〗	成年人	结伴出行	无限制	上午9:00-13:00	II 散步等，没有与花园设施接触
276	4	女〖女士*4〗	成年人	结伴出行	无限制	上午9:00-13:00	IV 在花园短暂停留，四处观望，闻香，触摸等〖观察鸟类科普信息〗
277	6┋7┋8┋9	女〖2〗	成年人	结伴出行	无限制	上午9:00-13:00	II 散步等，没有与花园设施接触
278	10	男	老年人	独自出行	无限制	上午9:00-13:00	IV 在花园短暂停留，四处观望，闻香，触摸等
279	14┋15	女	成年人	结伴出行	无限制	上午9:00-13:00	III 有进入花园的意图，但只是认为比较安静，休憩聊天
280	3	女〖女*2，一年轻一年老〗	老年人	结伴出行	无限制	上午9:00-13:00	IV 在花园短暂停留，四处观望，闻香，触摸等〖互相拍照留念，背景是木格栅和湖-10.35〗
281	5	女〖2〗	成年人	结伴出行	无限制	上午9:00-13:00	IV 在花园短暂停留，四处观望，闻香，触摸等〖拍照〗
282	11┋12┋14┋15	女	成年人	结伴出行	无限制	上午9:00-13:00	III 有进入花园的意图，但只是认为比较安静，休憩聊天
283	10	男	老年人	结伴出行	无限制	上午9:00-13:00	II 散步等，没有与花园设施接触
284	7	男	老年人	结伴出行	无限制	上午9:00-13:00	IV 在花园短暂停留，四处观望，闻香，触摸等〖拍照〗
285	10	男	老年人	结伴出行	无限制	上午9:00-13:00	II 散步等，没有与花园设施接触
286	6┋8	男	老年人	结伴出行	无限制	上午9:00-13:00	II 散步等，没有与花园设施接触
287	14┋15	女	成年人	结伴出行	无限制	上午9:00-13:00	II 散步等，没有与花园设施接触
288	6┋7┋8	女	老年人	结伴出行	无限制	上午9:00-13:00	II 散步等，没有与花园设施接触
289	3┋4	女〖成年人带小孩〗	成年人	结伴出行	婴儿车	上午9:00-13:00	III 有进入花园的意图，但只是认为比较安静，休憩聊天〖只是推着婴儿车在木栅到这里的通道走，基本无停留，速度较慢〗
290	14┋15	女	成年人	结伴出行	无限制	上午9:00-13:00	II 散步等，没有与花园设施接触
291	15	男	儿童	结伴出行	无限制	上午9:00-13:00	IV 在花园短暂停留，四处观望，闻香，触摸等
292	15	女	儿童	结伴出行	无限制	上午9:00-13:00	V 与花园保持一段时间的接触，锻炼，通过每一处设施，敲击感官设施等行为
293	4	男〖一男一女，男照顾女〗	老年人	结伴出行	轮椅	上午9:00-13:00	V 与花园保持一段时间的接触，锻炼，通过每一处设施，敲击感官设施等行为〖10.38-缓慢推轮椅，靠近湖边女下轮椅，观察湖景，扶着栏杆缓慢走，换成男的坐在轮椅上，长时间停留。〗
294	15	男	儿童	结伴出行	无限制	上午9:00-13:00	V 与花园保持一段时间的接触，锻炼，通过每一处设施，敲击感官设施等行为
295	11┋15	男	成年人	结伴出行	无限制	上午9:00-13:00	II 散步等，没有与花园设施接触
296	11┋15	男	老年人	结伴出行	无限制	上午9:00-13:00	III 有进入花园的意图，但只是认为比较安静，休憩聊天
297	2	男	老年人	独自出行	无限制	上午9:00-13:00	III 有进入花园的意图，但只是认为比较安静，休憩聊天〖在花卉大道上步行，但是视线一直看无障碍花园〗
298	10	男	成年人	结伴出行	无限制	上午9:00-13:00	II 散步等，没有与花园设施接触
299	2	女〖女*2〗	成年人	结伴出行	无限制	上午9:00-13:00	I 用最短路径穿过花园，没有视线交流
300	10	女	成年人	结伴出行	无限制	上午9:00-13:00	II 散步等，没有与花园设施接触
301	11┋15	男	成年人	结伴出行	无限制	上午9:00-13:00	II 散步等，没有与花园设施接触
302	2	女	老年人	独自出行	无限制	上午9:00-13:00	IV 在花园短暂停留，四处观望，闻香，触摸等〖拍照，对着湖景喷泉〗
303	6┋7┋8	女	成年人	结伴出行	无限制	上午9:00-13:00	II 散步等，没有与花园设施接触
304	10┋11	女	成年人	独自出行	无限制	上午9:00-13:00	III 有进入花园的意图，但只是认为比较安静，休憩聊天
305	6┋7┋8	男	成年人	结伴出行	无限制	上午9:00-13:00	II 散步等，没有与花园设施接触
306	10	男	成年人	结伴出行	无限制	上午9:00-13:00	II 散步等，没有与花园设施接触
307	15	男	成年人	结伴出行	无限制	上午9:00-13:00	V 与花园保持一段时间的接触，锻炼，通过每一处设施，敲击感官设施等行为
308	3	男〖一男一女〗	老年人	结伴出行	无限制	上午9:00-13:00	I 用最短路径穿过花园，没有视线交流
309	15	女	成年人	结伴出行	无限制	上午9:00-13:00	V 与花园保持一段时间的接触，锻炼，通过每一处设施，敲击感官设施等行为
310	3	男〖一男一女〗	老年人	结伴出行	无限制	上午9:00-13:00	IV 在花园短暂停留，四处观望，闻香，触摸等〖仔细观看鸟类科普信息〗
311	10	男	成年人	结伴出行	无限制	上午9:00-13:00	II 散步等，没有与花园设施接触
312	10┋11	女	成年人	结伴出行	无限制	上午9:00-13:00	II 散步等，没有与花园设施接触
313	6┋7┋8	男	儿童	结伴出行	婴儿车	上午9:00-13:00	II 散步等，没有与花园设施接触
314	11┋14┋15	女	成年人	结伴出行	婴儿车	上午9:00-13:00	III 有进入花园的意图，但只是认为比较安静，休憩聊天
315	6┋7┋8	男〖2〗	成年人	结伴出行	无限制	上午9:00-13:00	II 散步等，没有与花园设施接触
316	6┋7┋8┋9	女	青少年	独自出行	无限制	上午9:00-13:00	II 散步等，没有与花园设施接触
317	6┋7┋8	男	成年人	独自出行	无限制	上午9:00-13:00	II 散步等，没有与花园设施接触
318	3	男〖一男一女〗	老年人	结伴出行	无限制	上午9:00-13:00	IV 在花园短暂停留，四处观望，闻香，触摸等〖面对湖景，男给女拍照；讨论鸟类信息〗
319	11	男	成年人	结伴出行	无限制	上午9:00-13:00	I 用最短路径穿过花园，没有视线交流
320	3	男〖一男一女〗	老年人	结伴出行	无限制	上午9:00-13:00	II 散步等，没有与花园设施接触
321	11	男	成年人	结伴出行	无限制	上午9:00-13:00	I 用最短路径穿过花园，没有视线交流
322	11	男	成年人	结伴出行	无限制	上午9:00-13:00	I 用最短路径穿过花园，没有视线交流
323	11┋15	男	成年人	结伴出行	无限制	上午9:00-13:00	II 散步等，没有与花园设施接触
324	11┋15	男	老年人	结伴出行	无限制	上午9:00-13:00	II 散步等，没有与花园设施接触
325	10	女	成年人	独自出行	无限制	上午9:00-13:00	III 有进入花园的意图，但只是认为比较安静，休憩聊天
326	6┋7┋8	女	成年人	结伴出行	无限制	上午9:00-13:00	II 散步等，没有与花园设施接触
327	11┋15	女	成年人	结伴出行	无限制	上午9:00-13:00	III 有进入花园的意图，但只是认为比较安静，休憩聊天
328	6┋7┋8┋9	男	成年人	结伴出行	无限制	上午9:00-13:00	II 散步等，没有与花园设施接触
329	9	女	成年人	结伴出行	无限制	上午9:00-13:00	IV 在花园短暂停留，四处观望，闻香，触摸等
330	2	男〖男*3〗	老年人	结伴出行	无限制	上午9:00-13:00	I 用最短路径穿过花园，没有视线交流
331	11┋15	女	成年人	结伴出行	无限制	上午9:00-13:00	III 有进入花园的意图，但只是认为比较安静，休憩聊天
332	8┋9┋10	男	成年人	结伴出行	轮椅	上午9:00-13:00	V 与花园保持一段时间的接触，锻炼，通过每一处设施，敲击感官设施等行为
333	6┋7┋8	男	成年人	独自出行	无限制	上午9:00-13:00	I 用最短路径穿过花园，没有视线交流
334	10	女	成年人	结伴出行	婴儿车	上午9:00-13:00	II 散步等，没有与花园设施接触
335	11	男	老年人	独自出行	无限制	上午9:00-13:00	I 用最短路径穿过花园，没有视线交流
336	10┋11	女	成年人	结伴出行	无限制	上午9:00-13:00	II 散步等，没有与花园设施接触
337	5	女〖3〗	老年人	结伴出行	无限制	上午9:00-13:00	IV 在花园短暂停留，四处观望，闻香，触摸等〖拍照〗
338	5	女〖4〗	老年人	结伴出行	无限制	上午9:00-13:00	IV 在花园短暂停留，四处观望，闻香，触摸等〖拍照〗
339	10┋11	女	成年人	结伴出行	无限制	上午9:00-13:00	II 散步等，没有与花园设施接触
340	5	男〖2〗	老年人	结伴出行	无限制	上午9:00-13:00	IV 在花园短暂停留，四处观望，闻香，触摸等〖拍照〗
341	10┋11	女	儿童	结伴出行	无限制	上午9:00-13:00	II 散步等，没有与花园设施接触
342	10┋11	男	成年人	结伴出行	无限制	上午9:00-13:00	II 散步等，没有与花园设施接触
343	10┋11	女	成年人	结伴出行	无限制	上午9:00-13:00	II 散步等，没有与花园设施接触
344	5	女〖3〗	老年人	结伴出行	无限制	上午9:00-13:00	III 有进入花园的意图，但只是认为比较安静，休憩聊天〖聊天〗
345	4	女〖女*2〗	老年人	结伴出行	无限制	上午9:00-13:00	III 有进入花园的意图，但只是认为比较安静，休憩聊天〖坐在座椅上聊天，休息〗
346	6┋7┋8	男〖3〗	成年人	结伴出行	无限制	上午9:00-13:00	I 用最短路径穿过花园，没有视线交流
347	6┋7┋8	女〖2〗	成年人	结伴出行	无限制	上午9:00-13:00	II 散步等，没有与花园设施接触
348	6┋7┋8	男〖2〗	儿童	结伴出行	婴儿车	上午9:00-13:00	II 散步等，没有与花园设施接触
349	7	女	成年人	独自出行	无限制	上午9:00-13:00	IV 在花园短暂停留，四处观望，闻香，触摸等〖拍照〗
350	6┋8	女	成年人	独自出行	无限制	上午9:00-13:00	II 散步等，没有与花园设施接触
351	8	女	成年人	独自出行	无限制	上午9:00-13:00	IV 在花园短暂停留，四处观望，闻香，触摸等〖拍照〗
352	6┋7┋8	男	老年人	结伴出行	无限制	上午9:00-13:00	II 散步等，没有与花园设施接触
353	6	女〖3〗	成年人	结伴出行	无限制	上午9:00-13:00	IV 在花园短暂停留，四处观望，闻香，触摸等〖拍照〗
354	6┋7┋8	女〖2〗	(空)	结伴出行	无限制	上午9:00-13:00	II 散步等，没有与花园设施接触
355	6┋7┋8┋9	女	成年人	独自出行	无限制	上午9:00-13:00	II 散步等，没有与花园设施接触
356	2	女〖女*2〗	成年人	结伴出行	无限制	上午9:00-13:00	II 散步等，没有与花园设施接触〖边散步边聊天步速较快〗
357	6┋7┋8	男	老年人	独自出行	无限制	上午9:00-13:00	II 散步等，没有与花园设施接触
358	4	女	成年人	独自出行	无限制	上午9:00-13:00	IV 在花园短暂停留，四处观望，闻香，触摸等〖手机架在在设施上短暂倚靠，发消息，停留时间有点长〗
359	11┋14┋15	男	老年人	结伴出行	无限制	上午9:00-13:00	II 散步等，没有与花园设施接触
360	11┋14┋15	女	老年人	结伴出行	无限制	上午9:00-13:00	II 散步等，没有与花园设施接触
361	11┋14┋15	女	成年人	结伴出行	无限制	上午9:00-13:00	II 散步等，没有与花园设施接触
362	7	女〖3〗	老年人	结伴出行	无限制	上午9:00-13:00	IV 在花园短暂停留，四处观望，闻香，触摸等〖拍照〗
363	5	女〖2〗	成年人	结伴出行	无限制	上午9:00-13:00	III 有进入花园的意图，但只是认为比较安静，休憩聊天
364	11	女	老年人	独自出行	无限制	上午9:00-13:00	I 用最短路径穿过花园，没有视线交流
365	6┋7┋8	女	老年人	独自出行	无限制	上午9:00-13:00	II 散步等，没有与花园设施接触
366	5	女〖2〗	成年人	结伴出行	无限制	上午9:00-13:00	III 有进入花园的意图，但只是认为比较安静，休憩聊天
367	6┋7┋8┋9	女〖2〗	成年人	独自出行	无限制	上午9:00-13:00	II 散步等，没有与花园设施接触
368	8	女	成年人	独自出行	无限制	上午9:00-13:00	II 散步等，没有与花园设施接触
369	14┋15	男	老年人	结伴出行	无限制	上午9:00-13:00	V 与花园保持一段时间的接触，锻炼，通过每一处设施，敲击感官设施等行为
370	15	女	老年人	结伴出行	无限制	上午9:00-13:00	V 与花园保持一段时间的接触，锻炼，通过每一处设施，敲击感官设施等行为
371	6┋7┋8	女	老年人	结伴出行	轮椅	上午9:00-13:00	II 散步等，没有与花园设施接触
372	6┋7┋8	(空)	成年人	结伴出行	无限制	上午9:00-13:00	II 散步等，没有与花园设施接触
373	6┋7┋8	男	老年人	结伴出行	无限制	上午9:00-13:00	II 散步等，没有与花园设施接触
374	15	女	老年人	结伴出行	轮椅	上午9:00-13:00	IV 在花园短暂停留，四处观望，闻香，触摸等
375	6┋7┋8	女	青少年	独自出行	无限制	上午9:00-13:00	I 用最短路径穿过花园，没有视线交流
376	6┋7┋8	男	成年人	独自出行	无限制	上午9:00-13:00	I 用最短路径穿过花园，没有视线交流
377	12┋14┋15	女	成年人	结伴出行	无限制	上午9:00-13:00	IV 在花园短暂停留，四处观望，闻香，触摸等
378	14┋15	男	儿童	结伴出行	无限制	上午9:00-13:00	V 与花园保持一段时间的接触，锻炼，通过每一处设施，敲击感官设施等行为
379	14┋15	女	成年人	结伴出行	无限制	上午9:00-13:00	IV 在花园短暂停留，四处观望，闻香，触摸等
380	3	男	成年人	独自出行	无限制	上午9:00-13:00	IV 在花园短暂停留，四处观望，闻香，触摸等〖拍摄湖景和鸟类信息，仔细观察〗
381	11┋14┋15	男	成年人	结伴出行	无限制	上午9:00-13:00	IV 在花园短暂停留，四处观望，闻香，触摸等
382	6┋7┋8	女	成年人	结伴出行	无限制	上午9:00-13:00	II 散步等，没有与花园设施接触
383	6┋7┋8	男	成年人	结伴出行	无限制	上午9:00-13:00	II 散步等，没有与花园设施接触
384	12	女	老年人	结伴出行	无限制	上午9:00-13:00	IV 在花园短暂停留，四处观望，闻香，触摸等
385	11┋14	女	成年人	结伴出行	无限制	上午9:00-13:00	I 用最短路径穿过花园，没有视线交流
386	3┋4	男〖五六个人，有老人小孩，男女都有，4女2男〗	成年人	结伴出行	无限制	上午9:00-13:00	V 与花园保持一段时间的接触，锻炼，通过每一处设施，敲击感官设施等行为〖带小孩一起玩（像是游客），仔细观察湖景和鸟类信息〗
387	14	男	成年人	结伴出行	无限制	上午9:00-13:00	I 用最短路径穿过花园，没有视线交流〖翻越栏杆〗
388	4	男〖一男一女〗	成年人	结伴出行	无限制	上午9:00-13:00	IV 在花园短暂停留，四处观望，闻香，触摸等〖坐在椅子上吃东西，看湖景（选了一个靠近湖的凳子）〗
389	4	男	成年人	独自出行	无限制	上午9:00-13:00	IV 在花园短暂停留，四处观望，闻香，触摸等〖用手机录音鸟类科普信息讲解〗
390	6┋7┋8	女〖2〗	成年人	结伴出行	无限制	上午9:00-13:00	II 散步等，没有与花园设施接触
391	6┋7┋8	男〖5〗	老年人	结伴出行	无限制	上午9:00-13:00	II 散步等，没有与花园设施接触
392	6┋7┋8	女〖3〗	老年人	结伴出行	无限制	上午9:00-13:00	II 散步等，没有与花园设施接触
393	6┋7┋8	男	儿童	结伴出行	无限制	上午9:00-13:00	II 散步等，没有与花园设施接触
394	7	男	成年人	独自出行	无限制	上午9:00-13:00	IV 在花园短暂停留，四处观望，闻香，触摸等〖拍照〗
395	6┋8	男	成年人	独自出行	无限制	上午9:00-13:00	II 散步等，没有与花园设施接触
396	6┋7┋8	女〖2〗	成年人	结伴出行	无限制	上午9:00-13:00	II 散步等，没有与花园设施接触
397	2	男〖小男孩+成年人（妈妈）〗	儿童	结伴出行	无限制	上午9:00-13:00	V 与花园保持一段时间的接触，锻炼，通过每一处设施，敲击感官设施等行为〖小孩踩木地板，听声音；妈妈主要是陪伴功能〗
398	3	(空)	成年人	独自出行	无限制	上午9:00-13:00	II 散步等，没有与花园设施接触〖快速走过，并打电话玩手机〗
399	12┋15	女	儿童	结伴出行	无限制	上午9:00-13:00	V 与花园保持一段时间的接触，锻炼，通过每一处设施，敲击感官设施等行为
400	10┋11┋15	女	成年人	结伴出行	婴儿车	上午9:00-13:00	V 与花园保持一段时间的接触，锻炼，通过每一处设施，敲击感官设施等行为
401	3	男〖小男孩+妈妈，2人〗	儿童	结伴出行	无限制	上午9:00-13:00	V 与花园保持一段时间的接触，锻炼，通过每一处设施，敲击感官设施等行为〖小孩指鸟类科普，玩木头桩子〗
402	3	女〖女*2〗	成年人	结伴出行	无限制	上午9:00-13:00	IV 在花园短暂停留，四处观望，闻香，触摸等〖约拍〗
403	3	女	老年人	独自出行	无限制	上午9:00-13:00	IV 在花园短暂停留，四处观望，闻香，触摸等〖拍照，观望〗
404	6┋7┋8	女	成年人	结伴出行	无限制	上午9:00-13:00	II 散步等，没有与花园设施接触
405	3	女〖女*3〗	成年人	结伴出行	无限制	上午9:00-13:00	IV 在花园短暂停留，四处观望，闻香，触摸等〖观望湖面，休憩〗
406	6┋7┋8	男	儿童	结伴出行	无限制	上午9:00-13:00	II 散步等，没有与花园设施接触
407	6┋7┋8	男	成年人	结伴出行	无限制	上午9:00-13:00	II 散步等，没有与花园设施接触
408	6┋7┋8	男	成年人	独自出行	无限制	上午9:00-13:00	I 用最短路径穿过花园，没有视线交流
409	3	男〖老人带小孩，男*2〗	儿童	结伴出行	无限制	上午9:00-13:00	V 与花园保持一段时间的接触，锻炼，通过每一处设施，敲击感官设施等行为〖儿童观察湖面，玩木格栅〗
410	6┋7┋8┋9	男	儿童	结伴出行	无限制	上午9:00-13:00	II 散步等，没有与花园设施接触
411	6┋7┋8┋9	男	成年人	结伴出行	无限制	上午9:00-13:00	II 散步等，没有与花园设施接触
412	6┋7┋8┋9	女	成年人	结伴出行	无限制	上午9:00-13:00	II 散步等，没有与花园设施接触
413	6┋7┋8	女	成年人	结伴出行	无限制	上午9:00-13:00	II 散步等，没有与花园设施接触
414	6┋7┋8	女	儿童	结伴出行	婴儿车	上午9:00-13:00	II 散步等，没有与花园设施接触
415	6┋7┋8	女	成年人	独自出行	无限制	上午9:00-13:00	I 用最短路径穿过花园，没有视线交流
416	6┋7┋8	女〖2〗	成年人	结伴出行	无限制	上午9:00-13:00	II 散步等，没有与花园设施接触
417	6┋7┋8	男	成年人	独自出行	无限制	上午9:00-13:00	I 用最短路径穿过花园，没有视线交流
418	2	男	成年人	独自出行	无限制	上午9:00-13:00	III 有进入花园的意图，但只是认为比较安静，休憩聊天〖短暂停留拍照〗
419	10┋11	女	成年人	结伴出行	无限制	上午9:00-13:00	I 用最短路径穿过花园，没有视线交流
420	10┋11	女	成年人	结伴出行	无限制	上午9:00-13:00	I 用最短路径穿过花园，没有视线交流
421	10┋11┋12┋13┋14┋15	女	儿童	结伴出行	无限制	上午9:00-13:00	V 与花园保持一段时间的接触，锻炼，通过每一处设施，敲击感官设施等行为
422	10┋15	男	成年人	结伴出行	婴儿车	上午9:00-13:00	III 有进入花园的意图，但只是认为比较安静，休憩聊天
423	3	男〖一男一女〗	成年人	结伴出行	无限制	上午9:00-13:00	IV 在花园短暂停留，四处观望，闻香，触摸等〖慢跑，拍视频（不是很好界定行为类型）〗
424	6┋7┋8┋9	男	老年人	独自出行	无限制	上午9:00-13:00	II 散步等，没有与花园设施接触
425	6┋7┋8	女	老年人	独自出行	无限制	上午9:00-13:00	II 散步等，没有与花园设施接触
426	3	女	成年人	独自出行	无限制	上午9:00-13:00	IV 在花园短暂停留，四处观望，闻香，触摸等〖观看鸟类科普信息，走走停停〗
427	2	女	成年人	独自出行	无限制	上午9:00-13:00	II 散步等，没有与花园设施接触〖路过，散步，从2附近穿出〗
428	2┋3	男	成年人	独自出行	无限制	上午9:00-13:00	II 散步等，没有与花园设施接触〖散步，步速较快，很少观察〗
429	13┋15	男	老年人	结伴出行	无限制	上午9:00-13:00	V 与花园保持一段时间的接触，锻炼，通过每一处设施，敲击感官设施等行为
430	8┋9┋15	女	老年人	结伴出行	无限制	上午9:00-13:00	IV 在花园短暂停留，四处观望，闻香，触摸等
431	3	男〖一男一女〗	老年人	结伴出行	无限制	上午9:00-13:00	IV 在花园短暂停留，四处观望，闻香，触摸等〖边散步边观察鸟类信息标识〗
432	3	男〖一男一女〗	成年人	结伴出行	无限制	上午9:00-13:00	IV 在花园短暂停留，四处观望，闻香，触摸等〖打卡拍照〗
433	11┋12┋14┋15	男	成年人	结伴出行	无限制	上午9:00-13:00	I 用最短路径穿过花园，没有视线交流
434	3	女〖两个中年女士带一男一女老年人〗	成年人	结伴出行	无限制	上午9:00-13:00	IV 在花园短暂停留，四处观望，闻香，触摸等〖拍照游览（像游客）〗
435	3┋4	男	成年人	独自出行	无限制	上午9:00-13:00	I 用最短路径穿过花园，没有视线交流〖步速较快，直接通行〗
436	10┋11	男	成年人	结伴出行	无限制	上午9:00-13:00	III 有进入花园的意图，但只是认为比较安静，休憩聊天
437	10┋11	男	老年人	结伴出行	无限制	上午9:00-13:00	III 有进入花园的意图，但只是认为比较安静，休憩聊天
438	3	男〖一男一女〗	成年人	结伴出行	无限制	上午9:00-13:00	IV 在花园短暂停留，四处观望，闻香，触摸等〖拍照打卡，玩木桩装置〗
439	8┋11┋13┋15	女	成年人	结伴出行	无限制	上午9:00-13:00	IV 在花园短暂停留，四处观望，闻香，触摸等
440	8┋9┋15	女	成年人	结伴出行	无限制	上午9:00-13:00	IV 在花园短暂停留，四处观望，闻香，触摸等
441	3	男〖男*2〗	老年人	结伴出行	无限制	上午9:00-13:00	IV 在花园短暂停留，四处观望，闻香，触摸等〖停下来观察湖面，鸟类信息等〗
442	8┋9┋10┋11┋15	女	老年人	结伴出行	无限制	上午9:00-13:00	IV 在花园短暂停留，四处观望，闻香，触摸等
443	3	男〖一家三口，父母+小孩〗	儿童	结伴出行	无限制	上午9:00-13:00	V 与花园保持一段时间的接触，锻炼，通过每一处设施，敲击感官设施等行为〖父母本身没有前往意愿，小孩想去看观鸟信息，所以一家人从花卉大道转到花园内，仔细观察鸟类信息标识〗
444	11	女	成年人	结伴出行	无限制	上午9:00-13:00	II 散步等，没有与花园设施接触
445	3	男	老年人	独自出行	无限制	上午9:00-13:00	IV 在花园短暂停留，四处观望，闻香，触摸等〖停留，观察湖面〗
446	10┋11	女	成年人	结伴出行	无限制	上午9:00-13:00	II 散步等，没有与花园设施接触
447	12┋14┋15	女	成年人	独自出行	无限制	上午9:00-13:00	II 散步等，没有与花园设施接触
448	11	女	老年人	结伴出行	无限制	上午9:00-13:00	II 散步等，没有与花园设施接触
449	3	男	老年人	独自出行	无限制	上午9:00-13:00	IV 在花园短暂停留，四处观望，闻香，触摸等〖观察鸟类信息〗
450	8┋9┋10┋11	女	老年人	结伴出行	无限制	上午9:00-13:00	II 散步等，没有与花园设施接触
451	3	女〖女*2〗	成年人	结伴出行	无限制	上午9:00-13:00	IV 在花园短暂停留，四处观望，闻香，触摸等〖观察鸟类信息标识，讨论，停留〗
452	8┋9┋10	女	老年人	独自出行	无限制	上午9:00-13:00	II 散步等，没有与花园设施接触
453	10┋11	女	成年人	独自出行	无限制	上午9:00-13:00	II 散步等，没有与花园设施接触
454	2	男〖一男一女〗	成年人	结伴出行	无限制	上午9:00-13:00	II 散步等，没有与花园设施接触〖游览，拍照（仅在2点位周围一小段），但很快穿出〗
455	3	男	老年人	独自出行	无限制	上午9:00-13:00	IV 在花园短暂停留，四处观望，闻香，触摸等〖一家人出行，但是其他人不想进这个花园，该男士对鸟类信息标识有兴趣，所以前往观察〗
456	2	男	老年人	独自出行	无限制	上午9:00-13:00	IV 在花园短暂停留，四处观望，闻香，触摸等〖对着植物拍照〗
457	8	女	成年人	独自出行	无限制	上午9:00-13:00	IV 在花园短暂停留，四处观望，闻香，触摸等
458	2	女	老年人	独自出行	无限制	下午13:00-18:00	III 有进入花园的意图，但只是认为比较安静，休憩聊天〖在座椅上休息，整理衣服〗
459	3	女〖女士*2+抱着小孩〗	成年人	结伴出行	无限制	下午13:00-18:00	II 散步等，没有与花园设施接触〖散步，穿行〗
460	7┋8	男	成年人	独自出行	无限制	下午13:00-18:00	II 散步等，没有与花园设施接触
461	3	男〖父母+婴儿〗	成年人	结伴出行	婴儿车	下午13:00-18:00	II 散步等，没有与花园设施接触〖仅慢速推婴儿车走过〗
462	3	男	老年人	独自出行	无限制	下午13:00-18:00	III 有进入花园的意图，但只是认为比较安静，休憩聊天〖在椅子上休憩，玩手机〗
463	3	男〖两男一女〗	成年人	结伴出行	无限制	下午13:00-18:00	II 散步等，没有与花园设施接触〖散步，步速较慢〗
464	3	男〖一男一女〗	成年人	结伴出行	无限制	下午13:00-18:00	I 用最短路径穿过花园，没有视线交流
465	3	男	老年人	独自出行	无限制	下午13:00-18:00	I 用最短路径穿过花园，没有视线交流
466	4	女	成年人	独自出行	无限制	下午13:00-18:00	IV 在花园短暂停留，四处观望，闻香，触摸等〖拍照，对走廊空间拍照，对湖面拍照，对鸟类标志拍照〗
467	8┋9┋10┋14┋15	女	老年人	结伴出行	无限制	上午9:00-13:00	III 有进入花园的意图，但只是认为比较安静，休憩聊天
468	11┋13	男	老年人	结伴出行	手账	下午13:00-18:00	III 有进入花园的意图，但只是认为比较安静，休憩聊天
469	10	男	老年人	独自出行	无限制	下午13:00-18:00	II 散步等，没有与花园设施接触
470	8┋9┋13┋14	女	老年人	结伴出行	无限制	下午13:00-18:00	III 有进入花园的意图，但只是认为比较安静，休憩聊天
471	8┋9┋14┋15	女	老年人	结伴出行	无限制	下午13:00-18:00	III 有进入花园的意图，但只是认为比较安静，休憩聊天
472	4	男〖一男一女〗	成年人	结伴出行	无限制	下午13:00-18:00	II 散步等，没有与花园设施接触〖散步，但怀疑能否从花园里穿行出去〗
473	3	男〖男性带小孩〗	成年人	结伴出行	无限制	下午13:00-18:00	IV 在花园短暂停留，四处观望，闻香，触摸等〖成年人带小孩认鸟，看湖景，带了专业相机〗
474	3	女〖三女+小孩〗	成年人	结伴出行	无限制	下午13:00-18:00	IV 在花园短暂停留，四处观望，闻香，触摸等〖观湖，认鸟〗
475	3	女	成年人	独自出行	无限制	下午13:00-18:00	II 散步等，没有与花园设施接触〖散步，步速较慢〗
476	9┋10	女	成年人	结伴出行	无限制	下午13:00-18:00	II 散步等，没有与花园设施接触
477	10	女	成年人	结伴出行	无限制	下午13:00-18:00	II 散步等，没有与花园设施接触
478	3	男〖一男一女〗	成年人	结伴出行	无限制	下午13:00-18:00	II 散步等，没有与花园设施接触〖从3点位入口进入，仅散步〗
479	8┋9┋10┋14┋15	男	成年人	独自出行	无限制	下午13:00-18:00	II 散步等，没有与花园设施接触
480	3	男	老年人	独自出行	无限制	下午13:00-18:00	II 散步等，没有与花园设施接触
481	7┋9	男	成年人	结伴出行	无限制	下午13:00-18:00	II 散步等，没有与花园设施接触
482	3	男〖一男一女〗	老年人	结伴出行	无限制	下午13:00-18:00	IV 在花园短暂停留，四处观望，闻香，触摸等〖散步，看鸟类标识，相互聊天〗
483	3	男〖一男一女〗	老年人	结伴出行	无限制	下午13:00-18:00	II 散步等，没有与花园设施接触〖散步，从3点位附近出口穿出，但观察到老年人腿脚不便，步速很慢〗
484	2	男〖一男一女〗	成年人	结伴出行	无限制	下午13:00-18:00	IV 在花园短暂停留，四处观望，闻香，触摸等〖观察植物〗
485	10┋11┋14┋15	男	老年人	独自出行	无限制	下午13:00-18:00	II 散步等，没有与花园设施接触
486	3	女〖女士*2〗	成年人	结伴出行	无限制	下午13:00-18:00	III 有进入花园的意图，但只是认为比较安静，休憩聊天〖缓慢散步，休憩，聊天〗
487	3	男〖一男一女〗	老年人	结伴出行	无限制	下午13:00-18:00	III 有进入花园的意图，但只是认为比较安静，休憩聊天〖在椅子上休息，相互聊天，带了拐杖〗
488	3	女〖两个年轻女性〗	成年人	结伴出行	无限制	下午13:00-18:00	IV 在花园短暂停留，四处观望，闻香，触摸等〖观察鸟类标识〗
489	4	女	老年人	独自出行	无限制	下午13:00-18:00	III 有进入花园的意图，但只是认为比较安静，休憩聊天〖坐着休息，整理衣物〗
490	4	男〖男*2+女*1〗	老年人	结伴出行	无限制	下午13:00-18:00	V 与花园保持一段时间的接触，锻炼，通过每一处设施，敲击感官设施等行为〖对着湖面拉二胡〗
491	7┋8┋9┋13┋14	女	老年人	结伴出行	无限制	下午13:00-18:00	I 用最短路径穿过花园，没有视线交流
492	12	男〖2〗	成年人	结伴出行	无限制	下午13:00-18:00	V 与花园保持一段时间的接触，锻炼，通过每一处设施，敲击感官设施等行为
493	6┋7┋8	男	成年人	独自出行	无限制	下午13:00-18:00	II 散步等，没有与花园设施接触
494	6┋7┋8	女	成年人	独自出行	无限制	下午13:00-18:00	II 散步等，没有与花园设施接触
495	6┋7┋8	女	老年人	结伴出行	轮椅	下午13:00-18:00	II 散步等，没有与花园设施接触
496	6┋7┋8	男	老年人	结伴出行	无限制	下午13:00-18:00	II 散步等，没有与花园设施接触
497	10┋11┋14┋15	女	老年人	结伴出行	轮椅	下午13:00-18:00	II 散步等，没有与花园设施接触
498	11┋14┋15	男	老年人	结伴出行	无限制	下午13:00-18:00	II 散步等，没有与花园设施接触
499	2	女〖2孩1男2女〗	儿童	结伴出行	无限制	下午13:00-18:00	IV 在花园短暂停留，四处观望，闻香，触摸等
500	3	男	成年人	独自出行	无限制	下午13:00-18:00	III 有进入花园的意图，但只是认为比较安静，休憩聊天
501	10┋11	男	老年人	独自出行	无限制	下午13:00-18:00	II 散步等，没有与花园设施接触
502	6┋7┋8	男	成年人	结伴出行	无限制	下午13:00-18:00	II 散步等，没有与花园设施接触
503	6┋7┋8	女	成年人	结伴出行	无限制	下午13:00-18:00	II 散步等，没有与花园设施接触
504	3┋16	男	成年人	独自出行	无限制	下午13:00-18:00	IV 在花园短暂停留，四处观望，闻香，触摸等
505	8┋11	女	老年人	结伴出行	无限制	下午13:00-18:00	V 与花园保持一段时间的接触，锻炼，通过每一处设施，敲击感官设施等行为
506	2	女〖6人〗	老年人	结伴出行	无限制	下午13:00-18:00	IV 在花园短暂停留，四处观望，闻香，触摸等
507	11	男	成年人	结伴出行	无限制	下午13:00-18:00	II 散步等，没有与花园设施接触
508	2	女〖2人〗	老年人	结伴出行	无限制	下午13:00-18:00	III 有进入花园的意图，但只是认为比较安静，休憩聊天〖拍照室前聊天〗
509	10┋11	男	成年人	结伴出行	无限制	下午13:00-18:00	II 散步等，没有与花园设施接触
510	8	男	成年人	独自出行	无限制	下午13:00-18:00	IV 在花园短暂停留，四处观望，闻香，触摸等〖拍照〗
511	2┋3	男	成年人	独自出行	无限制	下午13:00-18:00	I 用最短路径穿过花园，没有视线交流
512	2	女	成年人	独自出行	无限制	下午13:00-18:00	II 散步等，没有与花园设施接触
513	6┋7┋8	女	成年人	结伴出行	无限制	下午13:00-18:00	II 散步等，没有与花园设施接触
514	6┋7┋8	男	儿童	结伴出行	无限制	下午13:00-18:00	II 散步等，没有与花园设施接触
515	14┋15	女	儿童	结伴出行	无限制	下午13:00-18:00	V 与花园保持一段时间的接触，锻炼，通过每一处设施，敲击感官设施等行为
516	15	女	成年人	结伴出行	无限制	下午13:00-18:00	V 与花园保持一段时间的接触，锻炼，通过每一处设施，敲击感官设施等行为
517	3	男	老年人	独自出行	无限制	下午13:00-18:00	IV 在花园短暂停留，四处观望，闻香，触摸等
518	6┋7┋8	男	成年人	结伴出行	无限制	下午13:00-18:00	II 散步等，没有与花园设施接触
519	11	男	老年人	结伴出行	无限制	下午13:00-18:00	I 用最短路径穿过花园，没有视线交流
520	4	男	成年人	独自出行	无限制	下午13:00-18:00	I 用最短路径穿过花园，没有视线交流
521	6┋7┋8┋9	女	成年人	结伴出行	无限制	下午13:00-18:00	II 散步等，没有与花园设施接触
522	8┋9	男〖3〗	老年人	结伴出行	无限制	下午13:00-18:00	III 有进入花园的意图，但只是认为比较安静，休憩聊天
523	8┋9	女〖2〗	老年人	结伴出行	无限制	下午13:00-18:00	III 有进入花园的意图，但只是认为比较安静，休憩聊天
524	10┋11	女	儿童	结伴出行	婴儿车	下午13:00-18:00	II 散步等，没有与花园设施接触
525	6┋7┋8	男〖2〗	老年人	结伴出行	无限制	下午13:00-18:00	II 散步等，没有与花园设施接触
526	11	男〖4个〗	成年人	结伴出行	无限制	下午13:00-18:00	I 用最短路径穿过花园，没有视线交流
527	6┋7┋8	女	老年人	独自出行	无限制	下午13:00-18:00	II 散步等，没有与花园设施接触
528	2┋3┋4	男	老年人	结伴出行	无限制	下午13:00-18:00	I 用最短路径穿过花园，没有视线交流
529	6┋7┋8	男〖4〗	青少年	结伴出行	无限制	下午13:00-18:00	II 散步等，没有与花园设施接触
530	10┋11	女	成年人	结伴出行	无限制	下午13:00-18:00	II 散步等，没有与花园设施接触
531	2┋3┋4	女〖夫妻〗	老年人	(空)	无限制	下午13:00-18:00	II 散步等，没有与花园设施接触
532	10┋11	男	老年人	结伴出行	无限制	下午13:00-18:00	II 散步等，没有与花园设施接触
533	15	男	老年人	结伴出行	无限制	下午13:00-18:00	IV 在花园短暂停留，四处观望，闻香，触摸等
534	6┋7┋8	男	青少年	独自出行	无限制	下午13:00-18:00	I 用最短路径穿过花园，没有视线交流
535	6┋7┋8	女	成年人	独自出行	无限制	下午13:00-18:00	II 散步等，没有与花园设施接触
536	15	男	老年人	结伴出行	无限制	下午13:00-18:00	IV 在花园短暂停留，四处观望，闻香，触摸等
537	11┋15	女	老年人	结伴出行	无限制	下午13:00-18:00	IV 在花园短暂停留，四处观望，闻香，触摸等
538	10┋11	男	成年人	结伴出行	无限制	下午13:00-18:00	III 有进入花园的意图，但只是认为比较安静，休憩聊天
539	10┋11	男	成年人	结伴出行	无限制	下午13:00-18:00	III 有进入花园的意图，但只是认为比较安静，休憩聊天
540	2	女〖2人母女〗	(空)	结伴出行	无限制	下午13:00-18:00	I 用最短路径穿过花园，没有视线交流
541	2	(空)	成年人	结伴出行	无限制	下午13:00-18:00	III 有进入花园的意图，但只是认为比较安静，休憩聊天〖调试照相机，聊天〗
542	5	女〖3〗	成年人	结伴出行	无限制	下午13:00-18:00	IV 在花园短暂停留，四处观望，闻香，触摸等〖拍照〗
543	2┋3┋4	女〖孩父母爷奶〗	成年人	结伴出行	无限制	下午13:00-18:00	II 散步等，没有与花园设施接触
544	3┋16	男	老年人	独自出行	无限制	下午13:00-18:00	IV 在花园短暂停留，四处观望，闻香，触摸等〖看鸟资料〗
545	5	女	成年人	独自出行	无限制	下午13:00-18:00	V 与花园保持一段时间的接触，锻炼，通过每一处设施，敲击感官设施等行为〖健身〗
546	6┋7┋8	男	儿童	结伴出行	无限制	下午13:00-18:00	II 散步等，没有与花园设施接触
547	3┋16	男〖保洁员〗	老年人	独自出行	无限制	下午13:00-18:00	III 有进入花园的意图，但只是认为比较安静，休憩聊天〖坐休息看水〗
548	6┋7┋8	女	儿童	结伴出行	无限制	下午13:00-18:00	II 散步等，没有与花园设施接触
549	6┋7┋8	男〖2〗	成年人	结伴出行	无限制	下午13:00-18:00	II 散步等，没有与花园设施接触
550	2┋3┋16	女〖母子〗	儿童	结伴出行	无限制	下午13:00-18:00	II 散步等，没有与花园设施接触〖指着鸟牌聊天〗
551	3┋16	女〖夫妻〗	老年人	结伴出行	无限制	下午13:00-18:00	II 散步等，没有与花园设施接触〖短暂看水〗
552	7	女〖2〗	成年人	结伴出行	无限制	下午13:00-18:00	IV 在花园短暂停留，四处观望，闻香，触摸等〖拍照〗
553	6┋7┋8	男	儿童	结伴出行	无限制	下午13:00-18:00	II 散步等，没有与花园设施接触
554	6┋7┋8	女	儿童	结伴出行	无限制	下午13:00-18:00	II 散步等，没有与花园设施接触
555	3	女〖4女一男〗	成年人	结伴出行	无限制	下午13:00-18:00	II 散步等，没有与花园设施接触〖统一着装想来找鸟，没找到跑了〗
556	6┋7┋8	男	成年人	结伴出行	无限制	下午13:00-18:00	II 散步等，没有与花园设施接触
557	6┋7┋8	女〖2〗	成年人	结伴出行	无限制	下午13:00-18:00	II 散步等，没有与花园设施接触
558	3┋16	女〖2男一女〗	成年人	结伴出行	无限制	下午13:00-18:00	II 散步等，没有与花园设施接触〖抽烟看水拍照〗
559	3┋16	女〖一男一女〗	老年人	结伴出行	无限制	下午13:00-18:00	IV 在花园短暂停留，四处观望，闻香，触摸等〖看水拍照看鸟牌〗
560	6┋7┋8	女〖4〗	成年人	结伴出行	无限制	下午13:00-18:00	III 有进入花园的意图，但只是认为比较安静，休憩聊天
561	8┋9	男	成年人	独自出行	无限制	下午13:00-18:00	II 散步等，没有与花园设施接触
562	3┋16	女〖一男一女〗	老年人	结伴出行	无限制	下午13:00-18:00	III 有进入花园的意图，但只是认为比较安静，休憩聊天〖看水坐着〗
563	6┋7┋8┋9	男	成年人	结伴出行	无限制	下午13:00-18:00	II 散步等，没有与花园设施接触
564	5	女	成年人	结伴出行	无限制	下午13:00-18:00	IV 在花园短暂停留，四处观望，闻香，触摸等〖拍照〗
565	3┋16	男	成年人	独自出行	无限制	下午13:00-18:00	II 散步等，没有与花园设施接触〖拍照〗
566	6┋7┋8	女	成年人	结伴出行	无限制	下午13:00-18:00	II 散步等，没有与花园设施接触
567	6┋7┋8	男	成年人	结伴出行	无限制	下午13:00-18:00	II 散步等，没有与花园设施接触
568	6┋7┋8	女〖2〗	成年人	结伴出行	无限制	下午13:00-18:00	II 散步等，没有与花园设施接触
569	6┋7┋8	男	成年人	结伴出行	无限制	下午13:00-18:00	II 散步等，没有与花园设施接触
570	15	男	儿童	结伴出行	无限制	下午13:00-18:00	V 与花园保持一段时间的接触，锻炼，通过每一处设施，敲击感官设施等行为
571	15	女	儿童	结伴出行	无限制	下午13:00-18:00	V 与花园保持一段时间的接触，锻炼，通过每一处设施，敲击感官设施等行为
572	11┋15	女	成年人	结伴出行	无限制	下午13:00-18:00	V 与花园保持一段时间的接触，锻炼，通过每一处设施，敲击感官设施等行为
573	6┋7┋8	女〖2〗	成年人	结伴出行	无限制	下午13:00-18:00	II 散步等，没有与花园设施接触
574	15	女	成年人	结伴出行	无限制	下午13:00-18:00	V 与花园保持一段时间的接触，锻炼，通过每一处设施，敲击感官设施等行为
575	6┋7┋8	男	成年人	结伴出行	无限制	下午13:00-18:00	II 散步等，没有与花园设施接触
576	15	男	老年人	结伴出行	无限制	下午13:00-18:00	V 与花园保持一段时间的接触，锻炼，通过每一处设施，敲击感官设施等行为
577	2	女〖孙女和奶奶〗	儿童	结伴出行	无限制	下午13:00-18:00	III 有进入花园的意图，但只是认为比较安静，休憩聊天〖小孩骑滑板车，坐在长椅上休息〗
578	14┋15	女	成年人	结伴出行	无限制	下午13:00-18:00	V 与花园保持一段时间的接触，锻炼，通过每一处设施，敲击感官设施等行为
579	14┋15	女	成年人	结伴出行	无限制	下午13:00-18:00	IV 在花园短暂停留，四处观望，闻香，触摸等
580	14┋15	男	成年人	结伴出行	无限制	下午13:00-18:00	IV 在花园短暂停留，四处观望，闻香，触摸等
581	2┋3┋4	女	老年人	独自出行	无限制	下午13:00-18:00	II 散步等，没有与花园设施接触〖来回的散步〗
582	10	女	成年人	结伴出行	无限制	下午13:00-18:00	V 与花园保持一段时间的接触，锻炼，通过每一处设施，敲击感官设施等行为
583	3┋4┋16	女	老年人	独自出行	无限制	下午13:00-18:00	II 散步等，没有与花园设施接触〖看看水看看牌子〗
584	11	女	儿童	结伴出行	无限制	下午13:00-18:00	I 用最短路径穿过花园，没有视线交流
585	5	男〖2〗	老年人	结伴出行	无限制	下午13:00-18:00	III 有进入花园的意图，但只是认为比较安静，休憩聊天
586	3┋4┋16	女〖一男一女〗	成年人	结伴出行	无限制	下午13:00-18:00	II 散步等，没有与花园设施接触
587	6┋7┋8	男	成年人	独自出行	无限制	下午13:00-18:00	I 用最短路径穿过花园，没有视线交流
588	2┋3	男	老年人	独自出行	无限制	下午13:00-18:00	III 有进入花园的意图，但只是认为比较安静，休憩聊天〖买菜休息〗
589	3┋16	女	老年人	独自出行	无限制	(空)	II 散步等，没有与花园设施接触〖看水〗
590	3┋16	女	成年人	独自出行	无限制	下午13:00-18:00	II 散步等，没有与花园设施接触〖看水〗
591	3┋4┋16	女〖一男一女〗	成年人	结伴出行	无限制	下午13:00-18:00	II 散步等，没有与花园设施接触〖看水〗
592	3┋16	女〖奶孙〗	儿童	结伴出行	婴儿车	下午13:00-18:00	II 散步等，没有与花园设施接触
593	10┋11	女	成年人	结伴出行	无限制	下午13:00-18:00	II 散步等，没有与花园设施接触
594	10┋11	女	成年人	结伴出行	无限制	下午13:00-18:00	II 散步等，没有与花园设施接触
595	3┋4┋16	女	成年人	独自出行	无限制	下午13:00-18:00	IV 在花园短暂停留，四处观望，闻香，触摸等〖拍鸟片，拍水〗
596	11┋15	女	儿童	结伴出行	无限制	下午13:00-18:00	I 用最短路径穿过花园，没有视线交流
597	14┋15	女	成年人	结伴出行	婴儿车	下午13:00-18:00	V 与花园保持一段时间的接触，锻炼，通过每一处设施，敲击感官设施等行为
598	6┋7┋8	男	儿童	结伴出行	无限制	下午13:00-18:00	II 散步等，没有与花园设施接触
599	11┋12┋14┋15	男	成年人	结伴出行	无限制	下午13:00-18:00	III 有进入花园的意图，但只是认为比较安静，休憩聊天
600	6┋7┋8	女	儿童	结伴出行	无限制	下午13:00-18:00	II 散步等，没有与花园设施接触
601	2	女	成年人	独自出行	无限制	下午13:00-18:00	III 有进入花园的意图，但只是认为比较安静，休憩聊天〖长椅睡觉〗
602	11┋12┋13┋14┋15	男	成年人	结伴出行	无限制	下午13:00-18:00	IV 在花园短暂停留，四处观望，闻香，触摸等
603	6┋7┋8	女	成年人	结伴出行	无限制	下午13:00-18:00	II 散步等，没有与花园设施接触
604	2	男〖2〗	成年人	结伴出行	无限制	下午13:00-18:00	II 散步等，没有与花园设施接触
605	11┋12┋13┋14┋15	女	老年人	结伴出行	无限制	下午13:00-18:00	IV 在花园短暂停留，四处观望，闻香，触摸等
606	2┋3	男	成年人	独自出行	无限制	下午13:00-18:00	II 散步等，没有与花园设施接触
607	6┋7┋8	男	青少年	独自出行	无限制	下午13:00-18:00	I 用最短路径穿过花园，没有视线交流
608	2	女〖2女1孩〗	儿童	结伴出行	无限制	下午13:00-18:00	II 散步等，没有与花园设施接触〖小范围徘徊离开〗
609	11	女	老年人	结伴出行	无限制	下午13:00-18:00	III 有进入花园的意图，但只是认为比较安静，休憩聊天
610	6┋7┋8┋9	女	老年人	独自出行	无限制	下午13:00-18:00	II 散步等，没有与花园设施接触
611	11	女	老年人	结伴出行	无限制	下午13:00-18:00	III 有进入花园的意图，但只是认为比较安静，休憩聊天
612	14┋15	女	儿童	结伴出行	无限制	下午13:00-18:00	V 与花园保持一段时间的接触，锻炼，通过每一处设施，敲击感官设施等行为
613	15	男	儿童	结伴出行	无限制	下午13:00-18:00	V 与花园保持一段时间的接触，锻炼，通过每一处设施，敲击感官设施等行为
614	14┋15	男	成年人	结伴出行	无限制	下午13:00-18:00	III 有进入花园的意图，但只是认为比较安静，休憩聊天
615	6┋7┋8	女〖2〗	成年人	结伴出行	无限制	下午13:00-18:00	II 散步等，没有与花园设施接触
616	14┋15	女	成年人	结伴出行	无限制	下午13:00-18:00	III 有进入花园的意图，但只是认为比较安静，休憩聊天
617	6┋7┋8	男	青少年	独自出行	无限制	下午13:00-18:00	I 用最短路径穿过花园，没有视线交流
618	6┋7┋8┋9	男	老年人	独自出行	无限制	下午13:00-18:00	II 散步等，没有与花园设施接触
619	10┋11	男	成年人	结伴出行	无限制	(空)	IV 在花园短暂停留，四处观望，闻香，触摸等
620	10┋11	女	成年人	结伴出行	无限制	下午13:00-18:00	IV 在花园短暂停留，四处观望，闻香，触摸等
621	6┋7┋8	女	成年人	结伴出行	无限制	下午13:00-18:00	II 散步等，没有与花园设施接触
622	14┋15	男	成年人	结伴出行	无限制	下午13:00-18:00	II 散步等，没有与花园设施接触
623	6┋7┋8	男	成年人	结伴出行	无限制	下午13:00-18:00	II 散步等，没有与花园设施接触
624	6┋7┋8	男	成年人	独自出行	无限制	下午13:00-18:00	II 散步等，没有与花园设施接触
625	11┋14┋15	女	成年人	结伴出行	无限制	下午13:00-18:00	II 散步等，没有与花园设施接触
626	11	男	老年人	结伴出行	无限制	下午13:00-18:00	I 用最短路径穿过花园，没有视线交流
627	14┋15	男	老年人	独自出行	无限制	下午13:00-18:00	IV 在花园短暂停留，四处观望，闻香，触摸等
628	15	女	儿童	结伴出行	无限制	下午13:00-18:00	V 与花园保持一段时间的接触，锻炼，通过每一处设施，敲击感官设施等行为
629	3┋16	女〖一男一女〗	成年人	结伴出行	无限制	下午13:00-18:00	IV 在花园短暂停留，四处观望，闻香，触摸等〖看水看鸟牌〗
630	7	男	老年人	独自出行	无限制	下午13:00-18:00	IV 在花园短暂停留，四处观望，闻香，触摸等〖一直看河水〗
631	15	女	成年人	结伴出行	无限制	下午13:00-18:00	V 与花园保持一段时间的接触，锻炼，通过每一处设施，敲击感官设施等行为
632	3┋4	男	成年人	独自出行	无限制	下午13:00-18:00	II 散步等，没有与花园设施接触
633	6┋8	男	老年人	独自出行	无限制	下午13:00-18:00	II 散步等，没有与花园设施接触
634	11	女	成年人	结伴出行	无限制	下午13:00-18:00	I 用最短路径穿过花园，没有视线交流
635	6┋7┋8	女〖2〗	成年人	结伴出行	无限制	下午13:00-18:00	II 散步等，没有与花园设施接触
636	15	女	成年人	结伴出行	无限制	下午13:00-18:00	I 用最短路径穿过花园，没有视线交流
637	15	男	成年人	结伴出行	无限制	下午13:00-18:00	III 有进入花园的意图，但只是认为比较安静，休憩聊天
638	6┋7┋8	女〖3〗	老年人	结伴出行	无限制	下午13:00-18:00	II 散步等，没有与花园设施接触
639	6┋7┋8	男	老年人	结伴出行	无限制	下午13:00-18:00	II 散步等，没有与花园设施接触
640	6┋7┋8	女	老年人	独自出行	无限制	下午13:00-18:00	II 散步等，没有与花园设施接触
641	11	女	老年人	结伴出行	无限制	下午13:00-18:00	I 用最短路径穿过花园，没有视线交流
642	11	女	老年人	结伴出行	无限制	下午13:00-18:00	I 用最短路径穿过花园，没有视线交流
643	3	女	成年人	独自出行	无限制	下午13:00-18:00	III 有进入花园的意图，但只是认为比较安静，休憩聊天〖在玩手机，〗
644	11	女	老年人	结伴出行	无限制	下午13:00-18:00	I 用最短路径穿过花园，没有视线交流
645	6┋7┋8	女	成年人	结伴出行	无限制	下午13:00-18:00	II 散步等，没有与花园设施接触
646	11	男	老年人	结伴出行	无限制	下午13:00-18:00	I 用最短路径穿过花园，没有视线交流
647	6┋7┋8	男	儿童	结伴出行	无限制	下午13:00-18:00	II 散步等，没有与花园设施接触
648	3┋4┋16	男	成年人	独自出行	无限制	下午13:00-18:00	II 散步等，没有与花园设施接触
649	10┋11	男	成年人	结伴出行	无限制	下午13:00-18:00	II 散步等，没有与花园设施接触
650	10┋11	女	成年人	结伴出行	无限制	下午13:00-18:00	I 用最短路径穿过花园，没有视线交流
651	6┋7┋8	女	成年人	结伴出行	无限制	下午13:00-18:00	II 散步等，没有与花园设施接触
652	6┋7┋8	男	成年人	结伴出行	无限制	下午13:00-18:00	II 散步等，没有与花园设施接触
653	5	女〖4〗	老年人	结伴出行	轮椅	下午13:00-18:00	II 散步等，没有与花园设施接触
654	5	女	老年人	结伴出行	手账	下午13:00-18:00	II 散步等，没有与花园设施接触
655	2┋3	女	成年人	独自出行	无限制	下午13:00-18:00	II 散步等，没有与花园设施接触
656	6┋7┋8┋9	男	成年人	独自出行	无限制	下午13:00-18:00	II 散步等，没有与花园设施接触
657	5	男	儿童	结伴出行	婴儿车	下午13:00-18:00	II 散步等，没有与花园设施接触
658	3┋16	女	成年人	独自出行	无限制	下午13:00-18:00	III 有进入花园的意图，但只是认为比较安静，休憩聊天〖以湖景为背景拍照〗
659	5	女	成年人	结伴出行	无限制	下午13:00-18:00	II 散步等，没有与花园设施接触
660	5	男	青少年	结伴出行	无限制	下午13:00-18:00	IV 在花园短暂停留，四处观望，闻香，触摸等〖拍照〗
661	5	女	成年人	结伴出行	无限制	下午13:00-18:00	IV 在花园短暂停留，四处观望，闻香，触摸等〖拍照〗
662	5	女〖2〗	成年人	结伴出行	无限制	下午13:00-18:00	III 有进入花园的意图，但只是认为比较安静，休憩聊天
663	5	男〖2〗	成年人	结伴出行	无限制	下午13:00-18:00	III 有进入花园的意图，但只是认为比较安静，休憩聊天〖聊天〗
664	3┋16	女〖一男一女〗	成年人	结伴出行	无限制	下午13:00-18:00	II 散步等，没有与花园设施接触
665	6	女〖3〗	成年人	结伴出行	无限制	下午13:00-18:00	IV 在花园短暂停留，四处观望，闻香，触摸等〖采摘果子〗
666	2	男〖3人〗	成年人	结伴出行	无限制	下午13:00-18:00	III 有进入花园的意图，但只是认为比较安静，休憩聊天
667	7	女	成年人	结伴出行	无限制	下午13:00-18:00	II 散步等，没有与花园设施接触
668	6┋8	女	成年人	结伴出行	无限制	下午13:00-18:00	II 散步等，没有与花园设施接触
669	6┋7┋8	男	成年人	独自出行	无限制	下午13:00-18:00	II 散步等，没有与花园设施接触
670	2┋16	女〖2〗	成年人	结伴出行	无限制	下午13:00-18:00	I 用最短路径穿过花园，没有视线交流
671	2┋16	女〖1男一女〗	成年人	结伴出行	无限制	下午13:00-18:00	I 用最短路径穿过花园，没有视线交流
672	11	男	成年人	结伴出行	无限制	下午13:00-18:00	I 用最短路径穿过花园，没有视线交流
673	2┋16	女	老年人	独自出行	无限制	下午13:00-18:00	I 用最短路径穿过花园，没有视线交流
674	11	女	成年人	结伴出行	无限制	下午13:00-18:00	I 用最短路径穿过花园，没有视线交流
675	6┋7┋8	男	老年人	结伴出行	无限制	下午13:00-18:00	II 散步等，没有与花园设施接触
676	11	女	成年人	结伴出行	无限制	下午13:00-18:00	I 用最短路径穿过花园，没有视线交流
677	2	男	成年人	独自出行	无限制	下午13:00-18:00	(空)
678	6┋7┋8	女	老年人	结伴出行	无限制	下午13:00-18:00	II 散步等，没有与花园设施接触
679	2	男	成年人	独自出行	无限制	下午13:00-18:00	I 用最短路径穿过花园，没有视线交流
680	11	女	成年人	结伴出行	无限制	下午13:00-18:00	I 用最短路径穿过花园，没有视线交流
681	2	女	成年人	独自出行	无限制	下午13:00-18:00	I 用最短路径穿过花园，没有视线交流
682	12	男	老年人	独自出行	轮椅	下午13:00-18:00	II 散步等，没有与花园设施接触
683	14	(空)	老年人	结伴出行	无限制	下午13:00-18:00	I 用最短路径穿过花园，没有视线交流
684	14┋15	男	老年人	结伴出行	无限制	下午13:00-18:00	I 用最短路径穿过花园，没有视线交流
685	5	男	儿童	结伴出行	无限制	下午13:00-18:00	II 散步等，没有与花园设施接触
686	5┋6┋7┋8	女	儿童	结伴出行	无限制	下午13:00-18:00	II 散步等，没有与花园设施接触
687	3	女	成年人	独自出行	无限制	下午13:00-18:00	II 散步等，没有与花园设施接触〖拍了胡的照片走了〗
688	7	男	老年人	独自出行	无限制	下午13:00-18:00	IV 在花园短暂停留，四处观望，闻香，触摸等
689	15	女	儿童	结伴出行	无限制	下午13:00-18:00	V 与花园保持一段时间的接触，锻炼，通过每一处设施，敲击感官设施等行为
690	15	女	成年人	结伴出行	无限制	下午13:00-18:00	III 有进入花园的意图，但只是认为比较安静，休憩聊天
691	3┋16	女	成年人	独自出行	无限制	下午13:00-18:00	II 散步等，没有与花园设施接触
692	10┋11	女	成年人	结伴出行	无限制	下午13:00-18:00	I 用最短路径穿过花园，没有视线交流
693	3┋16	女〖一男一女〗	成年人	结伴出行	无限制	下午13:00-18:00	II 散步等，没有与花园设施接触〖看鸟牌，拍水〗
694	5	女〖2〗	老年人	结伴出行	无限制	下午13:00-18:00	III 有进入花园的意图，但只是认为比较安静，休憩聊天
695	15	男	老年人	独自出行	无限制	下午13:00-18:00	V 与花园保持一段时间的接触，锻炼，通过每一处设施，敲击感官设施等行为
696	6┋7┋8	女〖3〗	老年人	结伴出行	无限制	下午13:00-18:00	II 散步等，没有与花园设施接触
697	2┋3┋16	女〖一男一女老〗	成年人	结伴出行	无限制	下午13:00-18:00	II 散步等，没有与花园设施接触
698	14┋15	女	老年人	结伴出行	无限制	下午13:00-18:00	I 用最短路径穿过花园，没有视线交流
699	14┋15	女	老年人	结伴出行	无限制	下午13:00-18:00	I 用最短路径穿过花园，没有视线交流
700	14┋15	女	老年人	结伴出行	无限制	下午13:00-18:00	I 用最短路径穿过花园，没有视线交流
701	5	女	成年人	结伴出行	无限制	下午13:00-18:00	V 与花园保持一段时间的接触，锻炼，通过每一处设施，敲击感官设施等行为〖健身〗
702	3┋16	女〖2〗	老年人	结伴出行	无限制	下午13:00-18:00	III 有进入花园的意图，但只是认为比较安静，休憩聊天〖在水边拍照休息〗
703	3┋16	男	老年人	独自出行	无限制	下午13:00-18:00	II 散步等，没有与花园设施接触〖排水〗
704	5	女〖2〗	成年人	结伴出行	无限制	下午13:00-18:00	II 散步等，没有与花园设施接触
705	10┋11	男	成年人	结伴出行	无限制	下午13:00-18:00	I 用最短路径穿过花园，没有视线交流
706	10┋11	女	成年人	结伴出行	无限制	下午13:00-18:00	I 用最短路径穿过花园，没有视线交流
707	5	女	成年人	独自出行	无限制	下午13:00-18:00	IV 在花园短暂停留，四处观望，闻香，触摸等〖触摸〗
708	6┋7┋8	男	成年人	独自出行	无限制	下午13:00-18:00	II 散步等，没有与花园设施接触
709	3┋16	男	成年人	独自出行	无限制	下午13:00-18:00	II 散步等，没有与花园设施接触〖拍水照片〗
710	14	女	成年人	独自出行	无限制	下午13:00-18:00	I 用最短路径穿过花园，没有视线交流
711	14┋15	女	成年人	独自出行	无限制	下午13:00-18:00	III 有进入花园的意图，但只是认为比较安静，休憩聊天
712	6┋7┋8	女	成年人	结伴出行	无限制	下午13:00-18:00	II 散步等，没有与花园设施接触
713	8	女	成年人	独自出行	无限制	下午13:00-18:00	V 与花园保持一段时间的接触，锻炼，通过每一处设施，敲击感官设施等行为〖观看sts〗
714	3┋16	男〖一男二女〗	老年人	结伴出行	轮椅	下午13:00-18:00	V 与花园保持一段时间的接触，锻炼，通过每一处设施，敲击感官设施等行为〖轮椅夫妇，看水锻炼〗
715	6┋7┋8	女	成年人	结伴出行	无限制	下午13:00-18:00	II 散步等，没有与花园设施接触
716	6┋7┋8	男	成年人	结伴出行	无限制	下午13:00-18:00	II 散步等，没有与花园设施接触
717	8┋14┋15	女	成年人	独自出行	无限制	上午9:00-13:00	IV 在花园短暂停留，四处观望，闻香，触摸等
718	6┋7┋8	男	成年人	结伴出行	无限制	下午13:00-18:00	II 散步等，没有与花园设施接触
719	6┋7┋8	女	成年人	结伴出行	无限制	下午13:00-18:00	II 散步等，没有与花园设施接触
720	14	女	成年人	结伴出行	无限制	下午13:00-18:00	I 用最短路径穿过花园，没有视线交流
721	6┋7┋8	女	成年人	结伴出行	无限制	下午13:00-18:00	II 散步等，没有与花园设施接触
722	14	女	成年人	结伴出行	无限制	下午13:00-18:00	I 用最短路径穿过花园，没有视线交流
723	6┋7┋8	男	成年人	独自出行	无限制	下午13:00-18:00	II 散步等，没有与花园设施接触
724	14┋15	女	成年人	结伴出行	无限制	下午13:00-18:00	IV 在花园短暂停留，四处观望，闻香，触摸等〖评价花园对盲人的设计〗
725	11┋15	男	成年人	结伴出行	无限制	下午13:00-18:00	IV 在花园短暂停留，四处观望，闻香，触摸等
726	6┋7┋8	女	成年人	结伴出行	无限制	下午13:00-18:00	II 散步等，没有与花园设施接触
727	12┋13	男	成年人	结伴出行	无限制	下午13:00-18:00	III 有进入花园的意图，但只是认为比较安静，休憩聊天
728	6┋7┋8	女〖2〗	成年人	结伴出行	无限制	下午13:00-18:00	II 散步等，没有与花园设施接触
729	11	女	成年人	结伴出行	无限制	下午13:00-18:00	I 用最短路径穿过花园，没有视线交流
730	11	女	老年人	结伴出行	无限制	下午13:00-18:00	I 用最短路径穿过花园，没有视线交流
731	13┋14┋15	女	成年人	结伴出行	无限制	下午13:00-18:00	IV 在花园短暂停留，四处观望，闻香，触摸等
732	6┋7┋8	男	老年人	独自出行	无限制	下午13:00-18:00	II 散步等，没有与花园设施接触
733	14┋15	男	老年人	结伴出行	无限制	下午13:00-18:00	IV 在花园短暂停留，四处观望，闻香，触摸等
734	11┋12┋15	女	青少年	结伴出行	无限制	下午13:00-18:00	V 与花园保持一段时间的接触，锻炼，通过每一处设施，敲击感官设施等行为
735	11┋12┋15	女	成年人	结伴出行	无限制	下午13:00-18:00	III 有进入花园的意图，但只是认为比较安静，休憩聊天
736	11┋12┋15	女	老年人	结伴出行	无限制	下午13:00-18:00	III 有进入花园的意图，但只是认为比较安静，休憩聊天
737	2┋16	女〖3〗	成年人	结伴出行	无限制	下午13:00-18:00	IV 在花园短暂停留，四处观望，闻香，触摸等〖在聊关于花园相关的事情〗
738	15	女	儿童	结伴出行	无限制	下午13:00-18:00	V 与花园保持一段时间的接触，锻炼，通过每一处设施，敲击感官设施等行为
739	6┋7┋8	男	儿童	结伴出行	无限制	下午13:00-18:00	IV 在花园短暂停留，四处观望，闻香，触摸等〖触摸〗
740	15	女	成年人	结伴出行	无限制	下午13:00-18:00	III 有进入花园的意图，但只是认为比较安静，休憩聊天
741	6┋7┋8	女〖3〗	成年人	结伴出行	无限制	下午13:00-18:00	II 散步等，没有与花园设施接触
742	6┋7┋8	男	儿童	结伴出行	无限制	下午13:00-18:00	II 散步等，没有与花园设施接触
743	4┋16	女〖一男一女〗	成年人	结伴出行	无限制	下午13:00-18:00	II 散步等，没有与花园设施接触〖观水〗
744	15	女	儿童	结伴出行	无限制	下午13:00-18:00	V 与花园保持一段时间的接触，锻炼，通过每一处设施，敲击感官设施等行为
745	15	女	成年人	结伴出行	婴儿车	下午13:00-18:00	III 有进入花园的意图，但只是认为比较安静，休憩聊天
746	4┋16	女	成年人	独自出行	无限制	下午13:00-18:00	IV 在花园短暂停留，四处观望，闻香，触摸等〖很认真的观水〗
747	3┋4┋16	女〖一男一女〗	老年人	结伴出行	无限制	下午13:00-18:00	III 有进入花园的意图，但只是认为比较安静，休憩聊天〖座椅休息观水〗
748	15	女	老年人	独自出行	无限制	(空)	II 散步等，没有与花园设施接触
749	6┋7┋8	女	成年人	独自出行	无限制	下午13:00-18:00	II 散步等，没有与花园设施接触
750	10┋11	男	成年人	结伴出行	无限制	下午13:00-18:00	II 散步等，没有与花园设施接触
751	10┋11	女	成年人	结伴出行	无限制	下午13:00-18:00	II 散步等，没有与花园设施接触
752	3┋16	女〖一男一女〗	成年人	结伴出行	无限制	下午13:00-18:00	III 有进入花园的意图，但只是认为比较安静，休憩聊天〖聊天坐着观水〗
753	2┋16	女〖2〗	成年人	独自出行	无限制	下午13:00-18:00	II 散步等，没有与花园设施接触〖拍风景照〗
754	11┋15	女	老年人	结伴出行	无限制	下午13:00-18:00	IV 在花园短暂停留，四处观望，闻香，触摸等
755	11┋15	女	老年人	结伴出行	无限制	下午13:00-18:00	IV 在花园短暂停留，四处观望，闻香，触摸等
756	3	女〖母女〗	青少年	结伴出行	无限制	下午13:00-18:00	IV 在花园短暂停留，四处观望，闻香，触摸等〖吹贝壳〗
757	4┋16	女〖一男一女〗	成年人	结伴出行	无限制	下午13:00-18:00	IV 在花园短暂停留，四处观望，闻香，触摸等〖探石头〗
758	4┋16	女〖一女两个孩子〗	儿童	结伴出行	无限制	下午13:00-18:00	IV 在花园短暂停留，四处观望，闻香，触摸等〖玩水和石头，家长拍照〗
759	11	女	老年人	结伴出行	无限制	下午13:00-18:00	I 用最短路径穿过花园，没有视线交流
760	11	男	老年人	结伴出行	无限制	下午13:00-18:00	I 用最短路径穿过花园，没有视线交流
761	11	男	老年人	结伴出行	无限制	下午13:00-18:00	I 用最短路径穿过花园，没有视线交流
762	11┋15	男	成年人	结伴出行	无限制	下午13:00-18:00	IV 在花园短暂停留，四处观望，闻香，触摸等
763	3	男〖2〗	成年人	结伴出行	无限制	下午13:00-18:00	I 用最短路径穿过花园，没有视线交流
764	11┋15	女	成年人	结伴出行	无限制	下午13:00-18:00	IV 在花园短暂停留，四处观望，闻香，触摸等
765	3┋16	男〖父子〗	儿童	结伴出行	无限制	下午13:00-18:00	IV 在花园短暂停留，四处观望，闻香，触摸等〖小孩子摸摸这个摸摸那个〗
766	6┋7┋8┋9	女〖2〗	成年人	结伴出行	无限制	下午13:00-18:00	II 散步等，没有与花园设施接触
767	9	女	成年人	结伴出行	无限制	下午13:00-18:00	III 有进入花园的意图，但只是认为比较安静，休憩聊天
768	9	男	成年人	结伴出行	无限制	下午13:00-18:00	II 散步等，没有与花园设施接触
769	8┋9	男	儿童	结伴出行	无限制	下午13:00-18:00	II 散步等，没有与花园设施接触
770	8┋9	男	成年人	结伴出行	无限制	下午13:00-18:00	II 散步等，没有与花园设施接触
771	15	女	儿童	结伴出行	无限制	下午13:00-18:00	V 与花园保持一段时间的接触，锻炼，通过每一处设施，敲击感官设施等行为
772	15	女	成年人	结伴出行	无限制	下午13:00-18:00	IV 在花园短暂停留，四处观望，闻香，触摸等
773	3┋16	男	老年人	独自出行	无限制	下午13:00-18:00	II 散步等，没有与花园设施接触
774	11	男	儿童	结伴出行	无限制	下午13:00-18:00	II 散步等，没有与花园设施接触
775	10	女	成年人	结伴出行	无限制	下午13:00-18:00	IV 在花园短暂停留，四处观望，闻香，触摸等
776	10	男	成年人	结伴出行	无限制	下午13:00-18:00	IV 在花园短暂停留，四处观望，闻香，触摸等
777	8	女	成年人	独自出行	无限制	下午13:00-18:00	V 与花园保持一段时间的接触，锻炼，通过每一处设施，敲击感官设施等行为〖观看sts〗
778	6┋7┋8	男	成年人	独自出行	无限制	下午13:00-18:00	II 散步等，没有与花园设施接触
779	6┋7	女	成年人	独自出行	无限制	下午13:00-18:00	II 散步等，没有与花园设施接触
780	10┋11	女	成年人	结伴出行	无限制	下午13:00-18:00	II 散步等，没有与花园设施接触
781	10┋11	女	老年人	结伴出行	无限制	下午13:00-18:00	II 散步等，没有与花园设施接触
782	6┋7┋8	男〖2〗	成年人	结伴出行	无限制	下午13:00-18:00	II 散步等，没有与花园设施接触
783	8	男	老年人	独自出行	无限制	下午13:00-18:00	V 与花园保持一段时间的接触，锻炼，通过每一处设施，敲击感官设施等行为〖看sts〗
784	6┋7	男	老年人	独自出行	无限制	下午13:00-18:00	II 散步等，没有与花园设施接触
785	3┋16	女〖一男一女〗	成年人	结伴出行	无限制	下午13:00-18:00	II 散步等，没有与花园设施接触〖观水拍照〗
786	14┋15	男	成年人	结伴出行	无限制	下午13:00-18:00	II 散步等，没有与花园设施接触
787	6┋7┋8	女	成年人	独自出行	无限制	下午13:00-18:00	II 散步等，没有与花园设施接触
788	10┋11	女	成年人	结伴出行	无限制	下午13:00-18:00	IV 在花园短暂停留，四处观望，闻香，触摸等
789	6┋7┋8	男	老年人	独自出行	无限制	下午13:00-18:00	II 散步等，没有与花园设施接触
790	6┋7┋8┋9	男	成年人	独自出行	无限制	下午13:00-18:00	II 散步等，没有与花园设施接触
791	6┋7┋8┋9	女	老年人	独自出行	无限制	下午13:00-18:00	II 散步等，没有与花园设施接触
792	6┋7┋8	男	成年人	结伴出行	无限制	下午13:00-18:00	II 散步等，没有与花园设施接触
793	6┋7┋8	女	成年人	结伴出行	无限制	下午13:00-18:00	II 散步等，没有与花园设施接触
794	9┋10	(空)	老年人	结伴出行	无限制	下午13:00-18:00	IV 在花园短暂停留，四处观望，闻香，触摸等
795	6┋7┋8	男〖2〗	成年人	结伴出行	无限制	下午13:00-18:00	II 散步等，没有与花园设施接触
796	9┋10	女	老年人	结伴出行	无限制	下午13:00-18:00	IV 在花园短暂停留，四处观望，闻香，触摸等
797	6┋7┋8	女〖2〗	成年人	结伴出行	无限制	下午13:00-18:00	I 用最短路径穿过花园，没有视线交流
798	10	女	成年人	独自出行	无限制	下午13:00-18:00	III 有进入花园的意图，但只是认为比较安静，休憩聊天
799	11	男	成年人	结伴出行	无限制	下午13:00-18:00	I 用最短路径穿过花园，没有视线交流
800	3┋4┋16	女〖母子〗	儿童	结伴出行	无限制	下午13:00-18:00	II 散步等，没有与花园设施接触
801	6┋7┋8	女	成年人	结伴出行	无限制	下午13:00-18:00	II 散步等，没有与花园设施接触
802	6┋7┋8	男	成年人	结伴出行	无限制	下午13:00-18:00	I 用最短路径穿过花园，没有视线交流
803	15	男	成年人	结伴出行	无限制	下午13:00-18:00	V 与花园保持一段时间的接触，锻炼，通过每一处设施，敲击感官设施等行为
804	5	男〖3〗	老年人	结伴出行	无限制	下午13:00-18:00	III 有进入花园的意图，但只是认为比较安静，休憩聊天
805	15	女	成年人	结伴出行	无限制	下午13:00-18:00	IV 在花园短暂停留，四处观望，闻香，触摸等
806	5	女〖2〗	老年人	结伴出行	无限制	下午13:00-18:00	III 有进入花园的意图，但只是认为比较安静，休憩聊天
807	5	男〖2〗	老年人	结伴出行	无限制	下午13:00-18:00	IV 在花园短暂停留，四处观望，闻香，触摸等〖拍照〗
808	3┋4┋16	女〖一男一女〗	成年人	结伴出行	无限制	下午13:00-18:00	II 散步等，没有与花园设施接触
809	6┋7┋8	女	成年人	结伴出行	无限制	下午13:00-18:00	II 散步等，没有与花园设施接触
810	6┋7┋8	男	成年人	结伴出行	无限制	下午13:00-18:00	II 散步等，没有与花园设施接触
811	14┋15	男	成年人	结伴出行	无限制	下午13:00-18:00	II 散步等，没有与花园设施接触
812	14┋15	女	成年人	结伴出行	无限制	下午13:00-18:00	I 用最短路径穿过花园，没有视线交流
813	7	男	成年人	结伴出行	无限制	下午13:00-18:00	IV 在花园短暂停留，四处观望，闻香，触摸等〖拍照〗
814	7	女	成年人	结伴出行	无限制	下午13:00-18:00	IV 在花园短暂停留，四处观望，闻香，触摸等〖拍照〗
815	6┋7┋8	男〖2〗	成年人	结伴出行	无限制	下午13:00-18:00	II 散步等，没有与花园设施接触
816	6┋8	男	成年人	结伴出行	无限制	下午13:00-18:00	II 散步等，没有与花园设施接触
817	6┋8	女	成年人	结伴出行	无限制	下午13:00-18:00	II 散步等，没有与花园设施接触
818	2┋3┋4┋16	女〖母子〗	儿童	结伴出行	无限制	下午13:00-18:00	II 散步等，没有与花园设施接触
819	2	女	成年人	独自出行	无限制	下午13:00-18:00	III 有进入花园的意图，但只是认为比较安静，休憩聊天〖座椅休息〗
820	2┋3┋16	女〖母子〗	儿童	结伴出行	无限制	下午13:00-18:00	IV 在花园短暂停留，四处观望，闻香，触摸等〖看水讨论〗
821	4	女〖爷孙〗	儿童	结伴出行	无限制	下午13:00-18:00	II 散步等，没有与花园设施接触
822	3┋16	男	成年人	独自出行	无限制	下午13:00-18:00	V 与花园保持一段时间的接触，锻炼，通过每一处设施，敲击感官设施等行为〖面对着水锻炼〗
823	11	女	成年人	结伴出行	无限制	下午13:00-18:00	III 有进入花园的意图，但只是认为比较安静，休憩聊天
824	11	女	成年人	结伴出行	无限制	下午13:00-18:00	III 有进入花园的意图，但只是认为比较安静，休憩聊天
825	6┋7┋8	女〖8〗	老年人	结伴出行	无限制	下午13:00-18:00	II 散步等，没有与花园设施接触
826	7	女〖2〗	老年人	结伴出行	无限制	下午13:00-18:00	IV 在花园短暂停留，四处观望，闻香，触摸等〖拍照〗
827	2┋16	女〖夫妻孩〗	儿童	结伴出行	无限制	下午13:00-18:00	I 用最短路径穿过花园，没有视线交流
828	11┋15	男	成年人	结伴出行	无限制	下午13:00-18:00	IV 在花园短暂停留，四处观望，闻香，触摸等
829	3┋4┋16	女	成年人	独自出行	无限制	下午13:00-18:00	II 散步等，没有与花园设施接触
830	11	女〖9〗	老年人	结伴出行	无限制	下午13:00-18:00	I 用最短路径穿过花园，没有视线交流
831	2┋16	女〖2女一子〗	(空)	结伴出行	婴儿车	下午13:00-18:00	IV 在花园短暂停留，四处观望，闻香，触摸等
832	6┋7┋8	女〖3〗	老年人	结伴出行	无限制	下午13:00-18:00	II 散步等，没有与花园设施接触
833	6┋7┋8	男〖2〗	老年人	结伴出行	无限制	下午13:00-18:00	II 散步等，没有与花园设施接触
834	6┋7┋8	女〖2〗	成年人	结伴出行	无限制	下午13:00-18:00	II 散步等，没有与花园设施接触
835	6┋7┋8	男	成年人	独自出行	无限制	下午13:00-18:00	II 散步等，没有与花园设施接触
836	3┋16	女〖2〗	成年人	结伴出行	无限制	下午13:00-18:00	II 散步等，没有与花园设施接触
837	15	女	成年人	结伴出行	无限制	下午13:00-18:00	V 与花园保持一段时间的接触，锻炼，通过每一处设施，敲击感官设施等行为
838	6┋7┋8	男	成年人	独自出行	无限制	下午13:00-18:00	II 散步等，没有与花园设施接触
839	14┋15	女	老年人	结伴出行	无限制	下午13:00-18:00	IV 在花园短暂停留，四处观望，闻香，触摸等
840	6┋7┋8	女	成年人	独自出行	无限制	下午13:00-18:00	II 散步等，没有与花园设施接触
841	14┋15	女	成年人	结伴出行	无限制	下午13:00-18:00	IV 在花园短暂停留，四处观望，闻香，触摸等
842	14┋15	男	老年人	结伴出行	无限制	下午13:00-18:00	II 散步等，没有与花园设施接触
843	14┋15	女	成年人	结伴出行	无限制	下午13:00-18:00	IV 在花园短暂停留，四处观望，闻香，触摸等
844	14┋15	女	成年人	结伴出行	无限制	下午13:00-18:00	IV 在花园短暂停留，四处观望，闻香，触摸等
845	6┋7┋8	男	老年人	独自出行	无限制	下午13:00-18:00	II 散步等，没有与花园设施接触
846	11	男	老年人	结伴出行	无限制	下午13:00-18:00	I 用最短路径穿过花园，没有视线交流
847	11	女	成年人	结伴出行	无限制	下午13:00-18:00	IV 在花园短暂停留，四处观望，闻香，触摸等
848	6┋7┋8	女	儿童	独自出行	无限制	下午13:00-18:00	I 用最短路径穿过花园，没有视线交流
849	2┋3┋4┋16	女	老年人	独自出行	无限制	下午13:00-18:00	II 散步等，没有与花园设施接触
850	8┋9┋10	男	成年人	独自出行	无限制	下午13:00-18:00	IV 在花园短暂停留，四处观望，闻香，触摸等
851	15	女	青少年	结伴出行	无限制	下午13:00-18:00	V 与花园保持一段时间的接触，锻炼，通过每一处设施，敲击感官设施等行为
852	6┋7┋8	女〖2〗	成年人	结伴出行	无限制	下午13:00-18:00	II 散步等，没有与花园设施接触
853	6┋7┋8	男	成年人	独自出行	无限制	下午13:00-18:00	II 散步等，没有与花园设施接触
854	15	女	老年人	结伴出行	无限制	下午13:00-18:00	III 有进入花园的意图，但只是认为比较安静，休憩聊天
855	15	男	儿童	结伴出行	无限制	下午13:00-18:00	V 与花园保持一段时间的接触，锻炼，通过每一处设施，敲击感官设施等行为
856	11┋15	男	老年人	结伴出行	无限制	下午13:00-18:00	III 有进入花园的意图，但只是认为比较安静，休憩聊天
857	11	男	成年人	结伴出行	无限制	下午13:00-18:00	II 散步等，没有与花园设施接触
858	11	女	成年人	结伴出行	无限制	下午13:00-18:00	II 散步等，没有与花园设施接触
859	2	男	成年人	结伴出行	无限制	下午13:00-18:00	V 与花园保持一段时间的接触，锻炼，通过每一处设施，敲击感官设施等行为〖锻炼〗
860	11	女	成年人	结伴出行	无限制	下午13:00-18:00	I 用最短路径穿过花园，没有视线交流
861	6	女〖2〗	老年人	结伴出行	无限制	下午13:00-18:00	IV 在花园短暂停留，四处观望，闻香，触摸等〖拍照〗
862	2┋16	女〖2〗	成年人	结伴出行	无限制	下午13:00-18:00	I 用最短路径穿过花园，没有视线交流
863	6┋7┋8	男	成年人	独自出行	无限制	下午13:00-18:00	II 散步等，没有与花园设施接触
864	6┋7┋8	女〖2〗	成年人	结伴出行	无限制	下午13:00-18:00	II 散步等，没有与花园设施接触
865	11	男	成年人	独自出行	无限制	下午13:00-18:00	II 散步等，没有与花园设施接触
866	6┋7┋8	男	儿童	结伴出行	无限制	下午13:00-18:00	II 散步等，没有与花园设施接触
867	11	女	老年人	独自出行	无限制	下午13:00-18:00	I 用最短路径穿过花园，没有视线交流
868	6┋7┋8	男	成年人	独自出行	无限制	下午13:00-18:00	II 散步等，没有与花园设施接触
869	5	男	成年人	独自出行	无限制	下午13:00-18:00	IV 在花园短暂停留，四处观望，闻香，触摸等〖拍照〗
870	2	女	成年人	独自出行	无限制	下午13:00-18:00	III 有进入花园的意图，但只是认为比较安静，休憩聊天
871	5	女〖2〗	老年人	结伴出行	无限制	下午13:00-18:00	IV 在花园短暂停留，四处观望，闻香，触摸等〖拍照〗
872	6┋7┋8	女〖3〗	老年人	结伴出行	无限制	下午13:00-18:00	II 散步等，没有与花园设施接触
873	5	女	成年人	独自出行	无限制	下午13:00-18:00	III 有进入花园的意图，但只是认为比较安静，休憩聊天
874	6┋7┋8	男	成年人	独自出行	无限制	下午13:00-18:00	II 散步等，没有与花园设施接触
875	6┋7┋8	女	成年人	结伴出行	无限制	下午13:00-18:00	II 散步等，没有与花园设施接触
876	7	女	成年人	结伴出行	无限制	下午13:00-18:00	IV 在花园短暂停留，四处观望，闻香，触摸等〖拍照〗
877	6┋7┋8	男	成年人	结伴出行	无限制	下午13:00-18:00	II 散步等，没有与花园设施接触
878	3┋4┋16	男	成年人	独自出行	无限制	下午13:00-18:00	II 散步等，没有与花园设施接触〖观水〗
879	6┋7┋8	男	成年人	结伴出行	无限制	下午13:00-18:00	II 散步等，没有与花园设施接触
880	5	女	成年人	结伴出行	无限制	下午13:00-18:00	IV 在花园短暂停留，四处观望，闻香，触摸等〖触摸〗
881	6┋7┋8	男	成年人	结伴出行	无限制	下午13:00-18:00	II 散步等，没有与花园设施接触
882	6┋7┋8	男	成年人	独自出行	无限制	下午13:00-18:00	II 散步等，没有与花园设施接触
883	6┋7┋8	女〖2〗	成年人	结伴出行	无限制	下午13:00-18:00	II 散步等，没有与花园设施接触
884	6┋7┋8	男	成年人	独自出行	无限制	下午13:00-18:00	I 用最短路径穿过花园，没有视线交流
885	6┋7┋8	男	成年人	结伴出行	无限制	下午13:00-18:00	II 散步等，没有与花园设施接触
886	6┋7┋8	女	成年人	独自出行	无限制	下午13:00-18:00	II 散步等，没有与花园设施接触
887	6┋7┋8	女	成年人	独自出行	无限制	下午13:00-18:00	II 散步等，没有与花园设施接触
888	6┋7┋8	女	成年人	独自出行	无限制	下午13:00-18:00	II 散步等，没有与花园设施接触
889	4	女	儿童	结伴出行	无限制	下午13:00-18:00	V 与花园保持一段时间的接触，锻炼，通过每一处设施，敲击感官设施等行为
890	4	女	儿童	结伴出行	无限制	下午13:00-18:00	V 与花园保持一段时间的接触，锻炼，通过每一处设施，敲击感官设施等行为
891	4	女	儿童	结伴出行	无限制	下午13:00-18:00	V 与花园保持一段时间的接触，锻炼，通过每一处设施，敲击感官设施等行为
892	4	女	儿童	结伴出行	无限制	下午13:00-18:00	V 与花园保持一段时间的接触，锻炼，通过每一处设施，敲击感官设施等行为
893	4	男	儿童	结伴出行	无限制	下午13:00-18:00	V 与花园保持一段时间的接触，锻炼，通过每一处设施，敲击感官设施等行为
894	4	女	老年人	结伴出行	婴儿车	下午13:00-18:00	III 有进入花园的意图，但只是认为比较安静，休憩聊天
895	7	女	成年人	结伴出行	无限制	下午13:00-18:00	IV 在花园短暂停留，四处观望，闻香，触摸等〖拍照〗
896	4	女	老年人	结伴出行	婴儿车	下午13:00-18:00	III 有进入花园的意图，但只是认为比较安静，休憩聊天
897	6┋8	女	成年人	结伴出行	无限制	下午13:00-18:00	II 散步等，没有与花园设施接触
898	6┋7┋8	男	成年人	结伴出行	无限制	下午13:00-18:00	II 散步等，没有与花园设施接触
899	4	男	老年人	结伴出行	无限制	下午13:00-18:00	III 有进入花园的意图，但只是认为比较安静，休憩聊天
900	14┋15	男	成年人	结伴出行	无限制	下午13:00-18:00	V 与花园保持一段时间的接触，锻炼，通过每一处设施，敲击感官设施等行为
901	14┋15	女	成年人	结伴出行	无限制	下午13:00-18:00	V 与花园保持一段时间的接触，锻炼，通过每一处设施，敲击感官设施等行为
902	15	男	儿童	结伴出行	无限制	下午13:00-18:00	V 与花园保持一段时间的接触，锻炼，通过每一处设施，敲击感官设施等行为
903	15	女	老年人	结伴出行	无限制	下午13:00-18:00	IV 在花园短暂停留，四处观望，闻香，触摸等
904	14┋15	女	老年人	结伴出行	无限制	下午13:00-18:00	IV 在花园短暂停留，四处观望，闻香，触摸等
905	14┋15	女	老年人	结伴出行	无限制	下午13:00-18:00	IV 在花园短暂停留，四处观望，闻香，触摸等
906	11	男	成年人	结伴出行	无限制	下午13:00-18:00	I 用最短路径穿过花园，没有视线交流
907	11	男	成年人	结伴出行	无限制	下午13:00-18:00	I 用最短路径穿过花园，没有视线交流
908	3┋16	男〖2〗	成年人	结伴出行	无限制	下午13:00-18:00	V 与花园保持一段时间的接触，锻炼，通过每一处设施，敲击感官设施等行为〖在水边锻炼〗
909	15	女	成年人	结伴出行	无限制	下午13:00-18:00	III 有进入花园的意图，但只是认为比较安静，休憩聊天
910	15	男	成年人	结伴出行	无限制	下午13:00-18:00	III 有进入花园的意图，但只是认为比较安静，休憩聊天
911	6┋7┋8	男〖2〗	成年人	结伴出行	无限制	下午13:00-18:00	II 散步等，没有与花园设施接触
912	7	女〖2〗	成年人	结伴出行	无限制	下午13:00-18:00	IV 在花园短暂停留，四处观望，闻香，触摸等〖拍照〗
913	15	男	老年人	结伴出行	无限制	下午13:00-18:00	III 有进入花园的意图，但只是认为比较安静，休憩聊天
914	6┋7┋8	男	成年人	独自出行	无限制	下午13:00-18:00	II 散步等，没有与花园设施接触
915	9	女〖2〗	成年人	结伴出行	无限制	下午13:00-18:00	IV 在花园短暂停留，四处观望，闻香，触摸等〖触摸〗
916	6┋7┋8	男	成年人	结伴出行	无限制	下午13:00-18:00	II 散步等，没有与花园设施接触
917	11	男	老年人	结伴出行	无限制	下午13:00-18:00	I 用最短路径穿过花园，没有视线交流
918	6┋7┋8	女	成年人	结伴出行	无限制	下午13:00-18:00	II 散步等，没有与花园设施接触
919	9	男	成年人	结伴出行	无限制	下午13:00-18:00	IV 在花园短暂停留，四处观望，闻香，触摸等〖触摸〗
920	11	女	老年人	结伴出行	无限制	下午13:00-18:00	I 用最短路径穿过花园，没有视线交流
921	6┋7┋8┋9	男	成年人	结伴出行	无限制	下午13:00-18:00	II 散步等，没有与花园设施接触
922	3┋16	男〖一男一女〗	成年人	结伴出行	无限制	下午13:00-18:00	II 散步等，没有与花园设施接触
923	6┋7┋8┋9	女	成年人	结伴出行	无限制	下午13:00-18:00	II 散步等，没有与花园设施接触
924	5	女〖2〗	老年人	结伴出行	无限制	下午13:00-18:00	III 有进入花园的意图，但只是认为比较安静，休憩聊天
925	3┋4┋16	女〖一男一女〗	成年人	结伴出行	无限制	下午13:00-18:00	II 散步等，没有与花园设施接触
926	6┋7┋8	女	成年人	独自出行	无限制	下午13:00-18:00	II 散步等，没有与花园设施接触
927	3┋4┋16	男〖父女〗	儿童	结伴出行	无限制	下午13:00-18:00	IV 在花园短暂停留，四处观望，闻香，触摸等〖看鸟牌看水〗
928	6┋7┋8	男	老年人	独自出行	无限制	下午13:00-18:00	II 散步等，没有与花园设施接触
929	11┋15	男	老年人	独自出行	无限制	下午13:00-18:00	IV 在花园短暂停留，四处观望，闻香，触摸等
930	9	男	成年人	结伴出行	无限制	下午13:00-18:00	III 有进入花园的意图，但只是认为比较安静，休憩聊天
931	9	女	成年人	结伴出行	无限制	下午13:00-18:00	III 有进入花园的意图，但只是认为比较安静，休憩聊天
932	7	男	老年人	独自出行	无限制	下午13:00-18:00	V 与花园保持一段时间的接触，锻炼，通过每一处设施，敲击感官设施等行为〖健身〗
933	6┋7┋8	男	成年人	结伴出行	无限制	下午13:00-18:00	II 散步等，没有与花园设施接触
934	6┋7┋8	女	成年人	结伴出行	无限制	下午13:00-18:00	II 散步等，没有与花园设施接触
935	6┋7┋8	男	成年人	结伴出行	无限制	下午13:00-18:00	IV 在花园短暂停留，四处观望，闻香，触摸等〖摄影〗
936	6┋7┋8	女	成年人	结伴出行	无限制	下午13:00-18:00	II 散步等，没有与花园设施接触
937	6┋7┋8	男	成年人	独自出行	无限制	下午13:00-18:00	I 用最短路径穿过花园，没有视线交流
938	10┋11	男	成年人	结伴出行	无限制	下午13:00-18:00	II 散步等，没有与花园设施接触
939	11	女	成年人	独自出行	无限制	下午13:00-18:00	II 散步等，没有与花园设施接触
940	10┋11	男	成年人	结伴出行	无限制	下午13:00-18:00	II 散步等，没有与花园设施接触
941	6┋7┋8┋9	女	成年人	独自出行	无限制	下午13:00-18:00	II 散步等，没有与花园设施接触
942	10┋11	女	老年人	独自出行	无限制	下午13:00-18:00	II 散步等，没有与花园设施接触
943	11	女	老年人	结伴出行	无限制	下午13:00-18:00	I 用最短路径穿过花园，没有视线交流
944	11	女	老年人	结伴出行	无限制	下午13:00-18:00	I 用最短路径穿过花园，没有视线交流
945	10	男	老年人	结伴出行	无限制	下午13:00-18:00	I 用最短路径穿过花园，没有视线交流
946	6┋7┋8	女〖2〗	老年人	结伴出行	无限制	下午13:00-18:00	II 散步等，没有与花园设施接触
947	6┋7┋8	女	老年人	独自出行	无限制	下午13:00-18:00	II 散步等，没有与花园设施接触
948	6┋7┋8	男〖2〗	成年人	结伴出行	无限制	下午13:00-18:00	II 散步等，没有与花园设施接触
949	10┋11	女	老年人	结伴出行	无限制	下午13:00-18:00	IV 在花园短暂停留，四处观望，闻香，触摸等
950	6┋7┋8	女	成年人	独自出行	无限制	下午13:00-18:00	II 散步等，没有与花园设施接触
951	6┋7┋8	女	儿童	结伴出行	无限制	下午13:00-18:00	II 散步等，没有与花园设施接触
952	9	女	儿童	结伴出行	无限制	下午13:00-18:00	IV 在花园短暂停留，四处观望，闻香，触摸等〖闻〗
953	11┋14┋15	男	成年人	结伴出行	无限制	下午13:00-18:00	II 散步等，没有与花园设施接触
954	6┋7┋8	男	成年人	结伴出行	无限制	下午13:00-18:00	II 散步等，没有与花园设施接触
955	3┋16	女	成年人	独自出行	无限制	下午13:00-18:00	V 与花园保持一段时间的接触，锻炼，通过每一处设施，敲击感官设施等行为〖晚锻炼〗
956	7	男	成年人	结伴出行	无限制	下午13:00-18:00	IV 在花园短暂停留，四处观望，闻香，触摸等〖拍照〗
957	11┋14┋15	男	成年人	结伴出行	无限制	下午13:00-18:00	II 散步等，没有与花园设施接触
958	6┋8	男	成年人	结伴出行	无限制	下午13:00-18:00	II 散步等，没有与花园设施接触
959	3┋16	男	成年人	独自出行	(空)	下午13:00-18:00	V 与花园保持一段时间的接触，锻炼，通过每一处设施，敲击感官设施等行为〖晚锻炼〗
960	6┋7┋8	女	成年人	结伴出行	无限制	下午13:00-18:00	II 散步等，没有与花园设施接触
961	12┋13┋14	男	青少年	结伴出行	无限制	下午13:00-18:00	V 与花园保持一段时间的接触，锻炼，通过每一处设施，敲击感官设施等行为
962	6┋7┋8┋9	女	成年人	结伴出行	无限制	下午13:00-18:00	II 散步等，没有与花园设施接触
963	3┋16	女	成年人	独自出行	无限制	下午13:00-18:00	II 散步等，没有与花园设施接触
964	6┋7┋8	女	儿童	结伴出行	无限制	下午13:00-18:00	II 散步等，没有与花园设施接触
965	11	男	成年人	独自出行	无限制	下午13:00-18:00	II 散步等，没有与花园设施接触
966	6	女	儿童	结伴出行	无限制	下午13:00-18:00	IV 在花园短暂停留，四处观望，闻香，触摸等〖触摸〗
967	15	女	成年人	结伴出行	无限制	下午13:00-18:00	V 与花园保持一段时间的接触，锻炼，通过每一处设施，敲击感官设施等行为
968	14┋15	女	成年人	结伴出行	无限制	下午13:00-18:00	V 与花园保持一段时间的接触，锻炼，通过每一处设施，敲击感官设施等行为
969	7┋8	男	成年人	结伴出行	无限制	下午13:00-18:00	IV 在花园短暂停留，四处观望，闻香，触摸等〖触摸〗
970	7┋8	女	儿童	结伴出行	无限制	下午13:00-18:00	II 散步等，没有与花园设施接触
971	11	男	成年人	结伴出行	无限制	下午13:00-18:00	II 散步等，没有与花园设施接触
972	11	女	成年人	结伴出行	无限制	下午13:00-18:00	II 散步等，没有与花园设施接触
973	6┋7┋8	男	成年人	独自出行	无限制	下午13:00-18:00	II 散步等，没有与花园设施接触
974	2┋16	女〖2女带孩子〗	儿童	结伴出行	无限制	(空)	IV 在花园短暂停留，四处观望，闻香，触摸等
975	6┋7┋8	男	成年人	结伴出行	无限制	下午13:00-18:00	II 散步等，没有与花园设施接触
976	14	女	成年人	结伴出行	无限制	下午13:00-18:00	IV 在花园短暂停留，四处观望，闻香，触摸等
977	6┋7┋8	女	成年人	结伴出行	无限制	下午13:00-18:00	II 散步等，没有与花园设施接触
978	6┋7┋8	女	成年人	结伴出行	无限制	下午13:00-18:00	II 散步等，没有与花园设施接触
979	15	女	儿童	结伴出行	无限制	下午13:00-18:00	V 与花园保持一段时间的接触，锻炼，通过每一处设施，敲击感官设施等行为
980	6┋7┋8	男	成年人	结伴出行	无限制	下午13:00-18:00	II 散步等，没有与花园设施接触
981	14	女	儿童	结伴出行	无限制	下午13:00-18:00	V 与花园保持一段时间的接触，锻炼，通过每一处设施，敲击感官设施等行为
982	14┋15	男	成年人	结伴出行	无限制	下午13:00-18:00	V 与花园保持一段时间的接触，锻炼，通过每一处设施，敲击感官设施等行为
983	6┋7┋8	女	成年人	结伴出行	无限制	下午13:00-18:00	II 散步等，没有与花园设施接触
984	6┋7┋8	男	成年人	结伴出行	无限制	下午13:00-18:00	II 散步等，没有与花园设施接触
985	14┋15	女	成年人	结伴出行	无限制	下午13:00-18:00	II 散步等，没有与花园设施接触
986	14┋15	女	老年人	结伴出行	无限制	下午13:00-18:00	II 散步等，没有与花园设施接触
987	11	男	成年人	结伴出行	无限制	下午13:00-18:00	III 有进入花园的意图，但只是认为比较安静，休憩聊天〖栏杆锻炼〗
988	11	男	成年人	结伴出行	无限制	下午13:00-18:00	II 散步等，没有与花园设施接触
989	11	女	青少年	结伴出行	无限制	下午13:00-18:00	I 用最短路径穿过花园，没有视线交流
990	6┋7┋8	男	成年人	结伴出行	无限制	下午13:00-18:00	II 散步等，没有与花园设施接触
991	11	男	儿童	结伴出行	无限制	下午13:00-18:00	I 用最短路径穿过花园，没有视线交流
992	11	男	成年人	结伴出行	无限制	下午13:00-18:00	I 用最短路径穿过花园，没有视线交流
993	6┋7┋8	女	儿童	结伴出行	无限制	下午13:00-18:00	II 散步等，没有与花园设施接触
994	11	女	成年人	结伴出行	无限制	下午13:00-18:00	I 用最短路径穿过花园，没有视线交流
995	6┋7┋8	女	成年人	结伴出行	无限制	下午13:00-18:00	II 散步等，没有与花园设施接触
996	6┋7┋8	男	成年人	结伴出行	无限制	下午13:00-18:00	II 散步等，没有与花园设施接触
997	6┋7┋8	女	成年人	结伴出行	无限制	下午13:00-18:00	II 散步等，没有与花园设施接触
998	13	女	成年人	结伴出行	无限制	下午13:00-18:00	V 与花园保持一段时间的接触，锻炼，通过每一处设施，敲击感官设施等行为
999	6┋7┋8	女〖2〗	成年人	结伴出行	无限制	下午13:00-18:00	II 散步等，没有与花园设施接触
1000	11	女	成年人	结伴出行	无限制	下午13:00-18:00	I 用最短路径穿过花园，没有视线交流
1001	11	男	成年人	(空)	无限制	下午13:00-18:00	I 用最短路径穿过花园，没有视线交流
1002	11	女	老年人	结伴出行	无限制	下午13:00-18:00	I 用最短路径穿过花园，没有视线交流
1003	11┋14┋15	女	成年人	结伴出行	无限制	下午13:00-18:00	II 散步等，没有与花园设施接触
1004	11┋14┋15	女	成年人	结伴出行	无限制	下午13:00-18:00	II 散步等，没有与花园设施接触
1005	6┋7┋8┋9	女〖2〗	成年人	结伴出行	无限制	下午13:00-18:00	II 散步等，没有与花园设施接触
1006	4	女〖2〗	成年人	结伴出行	无限制	下午13:00-18:00	I 用最短路径穿过花园，没有视线交流
1007	6┋7┋8	女〖2〗	成年人	结伴出行	无限制	下午13:00-18:00	II 散步等，没有与花园设施接触
1008	11	女	成年人	独自出行	无限制	下午13:00-18:00	I 用最短路径穿过花园，没有视线交流
1009	6┋7┋8	女	成年人	独自出行	无限制	下午13:00-18:00	I 用最短路径穿过花园，没有视线交流
1010	11┋12	女	成年人	结伴出行	无限制	下午13:00-18:00	III 有进入花园的意图，但只是认为比较安静，休憩聊天〖大喊一声有草味〗
1011	6┋7┋8	女	老年人	结伴出行	无限制	下午13:00-18:00	II 散步等，没有与花园设施接触
1012	11	女	成年人	结伴出行	无限制	下午13:00-18:00	II 散步等，没有与花园设施接触
1013	6┋7┋8┋9	女	老年人	独自出行	无限制	下午13:00-18:00	II 散步等，没有与花园设施接触
1014	6┋7┋8	男	成年人	结伴出行	无限制	下午13:00-18:00	II 散步等，没有与花园设施接触
1015	7	女	成年人	结伴出行	无限制	上午9:00-13:00	IV 在花园短暂停留，四处观望，闻香，触摸等
1016	7	女	成年人	结伴出行	无限制	上午9:00-13:00	IV 在花园短暂停留，四处观望，闻香，触摸等
1017	6┋7┋8	女	成年人	结伴出行	无限制	上午9:00-13:00	II 散步等，没有与花园设施接触
1018	6┋7┋8	男	成年人	结伴出行	无限制	上午9:00-13:00	II 散步等，没有与花园设施接触
1019	6┋7┋8	男	成年人	结伴出行	无限制	上午9:00-13:00	II 散步等，没有与花园设施接触
1020	13┋14┋15	男	成年人	结伴出行	无限制	上午9:00-13:00	IV 在花园短暂停留，四处观望，闻香，触摸等
1021	13┋14┋15	男	成年人	结伴出行	无限制	上午9:00-13:00	IV 在花园短暂停留，四处观望，闻香，触摸等
1022	13┋14┋15	男	成年人	结伴出行	无限制	上午9:00-13:00	IV 在花园短暂停留，四处观望，闻香，触摸等
1023	5	女	成年人	结伴出行	无限制	上午9:00-13:00	IV 在花园短暂停留，四处观望，闻香，触摸等
1024	5	女	(空)	结伴出行	无限制	上午9:00-13:00	IV 在花园短暂停留，四处观望，闻香，触摸等
1025	5	男	成年人	结伴出行	无限制	上午9:00-13:00	IV 在花园短暂停留，四处观望，闻香，触摸等
1026	5	女	成年人	结伴出行	无限制	上午9:00-13:00	II 散步等，没有与花园设施接触
1027	5	男	成年人	结伴出行	无限制	上午9:00-13:00	IV 在花园短暂停留，四处观望，闻香，触摸等
1028	5	女	老年人	结伴出行	无限制	上午9:00-13:00	II 散步等，没有与花园设施接触
1029	6┋7┋8┋9	男	青少年	结伴出行	无限制	上午9:00-13:00	II 散步等，没有与花园设施接触
1030	5	女	老年人	结伴出行	无限制	上午9:00-13:00	IV 在花园短暂停留，四处观望，闻香，触摸等
1031	5	女	成年人	结伴出行	无限制	上午9:00-13:00	IV 在花园短暂停留，四处观望，闻香，触摸等
1032	5	女	老年人	独自出行	无限制	上午9:00-13:00	II 散步等，没有与花园设施接触
1033	2	男	成年人	结伴出行	无限制	上午9:00-13:00	I 用最短路径穿过花园，没有视线交流
1034	2	男	成年人	结伴出行	无限制	上午9:00-13:00	I 用最短路径穿过花园，没有视线交流
1035	5	男	儿童	结伴出行	无限制	上午9:00-13:00	II 散步等，没有与花园设施接触
1036	5	男	儿童	结伴出行	婴儿车	上午9:00-13:00	II 散步等，没有与花园设施接触
1037	5	男	儿童	结伴出行	婴儿车	下午13:00-18:00	II 散步等，没有与花园设施接触
1038	5	男	成年人	结伴出行	无限制	上午9:00-13:00	II 散步等，没有与花园设施接触
1039	5	女	成年人	结伴出行	无限制	上午9:00-13:00	II 散步等，没有与花园设施接触
1040	6┋7┋8	女	成年人	独自出行	无限制	上午9:00-13:00	II 散步等，没有与花园设施接触
1041	5	女	成年人	结伴出行	无限制	上午9:00-13:00	III 有进入花园的意图，但只是认为比较安静，休憩聊天
1042	5	女	成年人	结伴出行	无限制	上午9:00-13:00	II 散步等，没有与花园设施接触
1043	2	女	老年人	结伴出行	无限制	上午9:00-13:00	III 有进入花园的意图，但只是认为比较安静，休憩聊天
1044	2	男	老年人	结伴出行	无限制	上午9:00-13:00	III 有进入花园的意图，但只是认为比较安静，休憩聊天
1045	6┋7┋8	女	老年人	结伴出行	无限制	上午9:00-13:00	II 散步等，没有与花园设施接触
1046	6┋7┋8	女	老年人	结伴出行	无限制	上午9:00-13:00	II 散步等，没有与花园设施接触
1047	3	女	成年人	结伴出行	无限制	上午9:00-13:00	IV 在花园短暂停留，四处观望，闻香，触摸等
1048	3	女	儿童	结伴出行	无限制	上午9:00-13:00	IV 在花园短暂停留，四处观望，闻香，触摸等
1049	4	女	成年人	结伴出行	无限制	上午9:00-13:00	III 有进入花园的意图，但只是认为比较安静，休憩聊天
1050	4	女	成年人	结伴出行	无限制	上午9:00-13:00	III 有进入花园的意图，但只是认为比较安静，休憩聊天
1051	4	女	成年人	结伴出行	无限制	上午9:00-13:00	III 有进入花园的意图，但只是认为比较安静，休憩聊天
1052	5	男	老年人	结伴出行	无限制	上午9:00-13:00	IV 在花园短暂停留，四处观望，闻香，触摸等
1053	4	男	成年人	结伴出行	无限制	上午9:00-13:00	V 与花园保持一段时间的接触，锻炼，通过每一处设施，敲击感官设施等行为
1054	6┋7┋8	女	老年人	结伴出行	无限制	上午9:00-13:00	II 散步等，没有与花园设施接触
1055	2	女	青少年	结伴出行	无限制	上午9:00-13:00	II 散步等，没有与花园设施接触
1056	2	女	成年人	结伴出行	婴儿车	上午9:00-13:00	II 散步等，没有与花园设施接触
1057	3	女	儿童	结伴出行	无限制	上午9:00-13:00	V 与花园保持一段时间的接触，锻炼，通过每一处设施，敲击感官设施等行为
1058	6┋7┋8	女	成年人	结伴出行	无限制	上午9:00-13:00	III 有进入花园的意图，但只是认为比较安静，休憩聊天
1059	6┋7┋8	女	老年人	结伴出行	无限制	上午9:00-13:00	III 有进入花园的意图，但只是认为比较安静，休憩聊天
1060	2	女	老年人	结伴出行	无限制	上午9:00-13:00	III 有进入花园的意图，但只是认为比较安静，休憩聊天
1061	2	女	老年人	结伴出行	无限制	上午9:00-13:00	III 有进入花园的意图，但只是认为比较安静，休憩聊天
1062	2	女	老年人	结伴出行	无限制	上午9:00-13:00	III 有进入花园的意图，但只是认为比较安静，休憩聊天
1063	5	男	儿童	结伴出行	无限制	上午9:00-13:00	IV 在花园短暂停留，四处观望，闻香，触摸等
1064	5	男	儿童	结伴出行	无限制	上午9:00-13:00	IV 在花园短暂停留，四处观望，闻香，触摸等
1065	5	男	儿童	结伴出行	无限制	上午9:00-13:00	IV 在花园短暂停留，四处观望，闻香，触摸等
1066	5	男	儿童	结伴出行	无限制	上午9:00-13:00	IV 在花园短暂停留，四处观望，闻香，触摸等
1067	2	女	老年人	结伴出行	无限制	上午9:00-13:00	IV 在花园短暂停留，四处观望，闻香，触摸等
1068	2	女	老年人	结伴出行	无限制	上午9:00-13:00	II 散步等，没有与花园设施接触
1069	3┋4	男	老年人	结伴出行	无限制	上午9:00-13:00	V 与花园保持一段时间的接触，锻炼，通过每一处设施，敲击感官设施等行为
1070	6┋7┋8	男	成年人	结伴出行	无限制	上午9:00-13:00	II 散步等，没有与花园设施接触
1071	6┋7┋8	男	儿童	结伴出行	婴儿车	上午9:00-13:00	II 散步等，没有与花园设施接触
1072	2	女	成年人	结伴出行	无限制	上午9:00-13:00	V 与花园保持一段时间的接触，锻炼，通过每一处设施，敲击感官设施等行为
1073	6┋7┋8	女	成年人	结伴出行	无限制	上午9:00-13:00	III 有进入花园的意图，但只是认为比较安静，休憩聊天
1074	6┋7┋8	男	成年人	结伴出行	无限制	上午9:00-13:00	II 散步等，没有与花园设施接触
1075	6┋7┋8	男	成年人	结伴出行	无限制	上午9:00-13:00	II 散步等，没有与花园设施接触
1076	6┋7┋8	男	成年人	结伴出行	无限制	上午9:00-13:00	II 散步等，没有与花园设施接触
1077	7	男	老年人	结伴出行	无限制	上午9:00-13:00	III 有进入花园的意图，但只是认为比较安静，休憩聊天
1078	6┋7┋8	男	老年人	结伴出行	无限制	上午9:00-13:00	II 散步等，没有与花园设施接触
1079	6┋7┋8	男	老年人	结伴出行	无限制	上午9:00-13:00	II 散步等，没有与花园设施接触
1080	6┋7┋8	男	老年人	结伴出行	无限制	上午9:00-13:00	II 散步等，没有与花园设施接触
1081	6┋7┋8	男	老年人	结伴出行	无限制	上午9:00-13:00	II 散步等，没有与花园设施接触
1082	6┋7┋8	男	儿童	结伴出行	婴儿车	上午9:00-13:00	II 散步等，没有与花园设施接触
1083	6┋7┋8	男	老年人	结伴出行	无限制	上午9:00-13:00	III 有进入花园的意图，但只是认为比较安静，休憩聊天
1084	6┋7┋8	女	成年人	结伴出行	无限制	上午9:00-13:00	II 散步等，没有与花园设施接触
1085	9	女	老年人	结伴出行	无限制	上午9:00-13:00	II 散步等，没有与花园设施接触
1086	6┋7┋8	女	成年人	结伴出行	无限制	上午9:00-13:00	II 散步等，没有与花园设施接触
1087	6┋7┋8	女	成年人	结伴出行	无限制	上午9:00-13:00	II 散步等，没有与花园设施接触
1088	6┋7┋8	女	成年人	结伴出行	无限制	上午9:00-13:00	II 散步等，没有与花园设施接触
1089	4	女	成年人	结伴出行	无限制	上午9:00-13:00	IV 在花园短暂停留，四处观望，闻香，触摸等
1090	4	女	成年人	结伴出行	无限制	上午9:00-13:00	IV 在花园短暂停留，四处观望，闻香，触摸等
1091	4	女	成年人	结伴出行	无限制	上午9:00-13:00	IV 在花园短暂停留，四处观望，闻香，触摸等
1092	6┋7┋8┋9	女	成年人	结伴出行	无限制	上午9:00-13:00	II 散步等，没有与花园设施接触
1093	3	女	老年人	结伴出行	无限制	上午9:00-13:00	IV 在花园短暂停留，四处观望，闻香，触摸等
1094	5	女	成年人	结伴出行	无限制	上午9:00-13:00	IV 在花园短暂停留，四处观望，闻香，触摸等
1095	4	女	老年人	结伴出行	轮椅	上午9:00-13:00	V 与花园保持一段时间的接触，锻炼，通过每一处设施，敲击感官设施等行为
1096	2	女	成年人	结伴出行	无限制	上午9:00-13:00	I 用最短路径穿过花园，没有视线交流
1097	3	女	老年人	结伴出行	无限制	上午9:00-13:00	I 用最短路径穿过花园，没有视线交流
1098	3	女	老年人	结伴出行	无限制	上午9:00-13:00	IV 在花园短暂停留，四处观望，闻香，触摸等
1099	6┋7┋8	男	成年人	结伴出行	无限制	上午9:00-13:00	II 散步等，没有与花园设施接触
1100	3	女	老年人	结伴出行	无限制	上午9:00-13:00	IV 在花园短暂停留，四处观望，闻香，触摸等
1101	3	女	老年人	结伴出行	无限制	上午9:00-13:00	II 散步等，没有与花园设施接触
1102	2	男	老年人	结伴出行	无限制	上午9:00-13:00	I 用最短路径穿过花园，没有视线交流
1103	2	男	老年人	结伴出行	无限制	上午9:00-13:00	I 用最短路径穿过花园，没有视线交流
1104	5	女	老年人	结伴出行	无限制	上午9:00-13:00	IV 在花园短暂停留，四处观望，闻香，触摸等
1105	5	女	老年人	结伴出行	无限制	上午9:00-13:00	IV 在花园短暂停留，四处观望，闻香，触摸等
1106	5	女	老年人	结伴出行	无限制	上午9:00-13:00	IV 在花园短暂停留，四处观望，闻香，触摸等
1107	5	女	老年人	结伴出行	无限制	上午9:00-13:00	IV 在花园短暂停留，四处观望，闻香，触摸等
1108	5	女	老年人	结伴出行	无限制	上午9:00-13:00	IV 在花园短暂停留，四处观望，闻香，触摸等
1109	5	男	老年人	结伴出行	无限制	上午9:00-13:00	IV 在花园短暂停留，四处观望，闻香，触摸等
1110	5	女	老年人	结伴出行	无限制	上午9:00-13:00	III 有进入花园的意图，但只是认为比较安静，休憩聊天
1111	5	女	老年人	结伴出行	无限制	上午9:00-13:00	III 有进入花园的意图，但只是认为比较安静，休憩聊天
1112	4	女	老年人	结伴出行	无限制	上午9:00-13:00	III 有进入花园的意图，但只是认为比较安静，休憩聊天
1113	6┋7┋8	男	成年人	结伴出行	无限制	上午9:00-13:00	I 用最短路径穿过花园，没有视线交流
1114	6┋7┋8	男	成年人	结伴出行	无限制	上午9:00-13:00	I 用最短路径穿过花园，没有视线交流
1115	6┋7┋8	女	成年人	结伴出行	无限制	上午9:00-13:00	II 散步等，没有与花园设施接触
1116	6┋7┋8	男	儿童	结伴出行	婴儿车	上午9:00-13:00	II 散步等，没有与花园设施接触
1117	6	女	成年人	结伴出行	无限制	上午9:00-13:00	IV 在花园短暂停留，四处观望，闻香，触摸等
1118	6┋7┋8	女	(空)	结伴出行	无限制	上午9:00-13:00	II 散步等，没有与花园设施接触
1119	2	女	成年人	结伴出行	无限制	上午9:00-13:00	II 散步等，没有与花园设施接触
1120	7	女	老年人	结伴出行	无限制	上午9:00-13:00	IV 在花园短暂停留，四处观望，闻香，触摸等
1121	7	女	老年人	结伴出行	无限制	上午9:00-13:00	IV 在花园短暂停留，四处观望，闻香，触摸等
1122	5	女	成年人	结伴出行	无限制	上午9:00-13:00	III 有进入花园的意图，但只是认为比较安静，休憩聊天
1123	3┋4	女	成年人	结伴出行	无限制	上午9:00-13:00	V 与花园保持一段时间的接触，锻炼，通过每一处设施，敲击感官设施等行为
1124	3┋4	男	成年人	结伴出行	无限制	上午9:00-13:00	V 与花园保持一段时间的接触，锻炼，通过每一处设施，敲击感官设施等行为
1125	3┋4	女	成年人	结伴出行	无限制	上午9:00-13:00	V 与花园保持一段时间的接触，锻炼，通过每一处设施，敲击感官设施等行为
1126	4	女	成年人	结伴出行	无限制	上午9:00-13:00	IV 在花园短暂停留，四处观望，闻香，触摸等
1127	3	女	成年人	结伴出行	无限制	上午9:00-13:00	V 与花园保持一段时间的接触，锻炼，通过每一处设施，敲击感官设施等行为
1128	3	女	成年人	结伴出行	无限制	上午9:00-13:00	IV 在花园短暂停留，四处观望，闻香，触摸等
1129	3	男	老年人	结伴出行	无限制	上午9:00-13:00	IV 在花园短暂停留，四处观望，闻香，触摸等
1130	3	女	成年人	结伴出行	无限制	上午9:00-13:00	IV 在花园短暂停留，四处观望，闻香，触摸等
1131	3	男	成年人	结伴出行	无限制	上午9:00-13:00	IV 在花园短暂停留，四处观望，闻香，触摸等
1132	3	男	成年人	结伴出行	无限制	上午9:00-13:00	IV 在花园短暂停留，四处观望，闻香，触摸等
1133	3	男	老年人	结伴出行	无限制	上午9:00-13:00	IV 在花园短暂停留，四处观望，闻香，触摸等
1134	3	男	成年人	结伴出行	无限制	上午9:00-13:00	V 与花园保持一段时间的接触，锻炼，通过每一处设施，敲击感官设施等行为
1135	3	女	儿童	结伴出行	无限制	上午9:00-13:00	V 与花园保持一段时间的接触，锻炼，通过每一处设施，敲击感官设施等行为
1136	2	女	成年人	结伴出行	无限制	上午9:00-13:00	II 散步等，没有与花园设施接触
1137	3	女	成年人	结伴出行	无限制	下午13:00-18:00	II 散步等，没有与花园设施接触
1138	3	男	成年人	结伴出行	无限制	下午13:00-18:00	II 散步等，没有与花园设施接触
1139	3	女	成年人	结伴出行	无限制	下午13:00-18:00	I 用最短路径穿过花园，没有视线交流
1140	4	女	成年人	结伴出行	无限制	下午13:00-18:00	II 散步等，没有与花园设施接触
1141	3	女	儿童	结伴出行	无限制	下午13:00-18:00	IV 在花园短暂停留，四处观望，闻香，触摸等
1142	3	女	成年人	结伴出行	无限制	下午13:00-18:00	II 散步等，没有与花园设施接触
1143	3	女	老年人	结伴出行	无限制	下午13:00-18:00	IV 在花园短暂停留，四处观望，闻香，触摸等
1144	3	女	老年人	结伴出行	无限制	下午13:00-18:00	II 散步等，没有与花园设施接触
1145	2	女	成年人	结伴出行	无限制	下午13:00-18:00	IV 在花园短暂停留，四处观望，闻香，触摸等
1146	3	女	成年人	结伴出行	无限制	下午13:00-18:00	III 有进入花园的意图，但只是认为比较安静，休憩聊天
1147	3	女	老年人	结伴出行	无限制	下午13:00-18:00	III 有进入花园的意图，但只是认为比较安静，休憩聊天
1148	3	女	成年人	结伴出行	无限制	下午13:00-18:00	IV 在花园短暂停留，四处观望，闻香，触摸等
1149	4	男	老年人	结伴出行	无限制	下午13:00-18:00	V 与花园保持一段时间的接触，锻炼，通过每一处设施，敲击感官设施等行为
1150	4	女	老年人	结伴出行	无限制	下午13:00-18:00	V 与花园保持一段时间的接触，锻炼，通过每一处设施，敲击感官设施等行为
1151	2	女	儿童	结伴出行	无限制	下午13:00-18:00	IV 在花园短暂停留，四处观望，闻香，触摸等
1152	2	女	老年人	结伴出行	无限制	下午13:00-18:00	IV 在花园短暂停留，四处观望，闻香，触摸等
1153	2	女	老年人	结伴出行	无限制	下午13:00-18:00	IV 在花园短暂停留，四处观望，闻香，触摸等
1154	2	女	老年人	结伴出行	无限制	下午13:00-18:00	IV 在花园短暂停留，四处观望，闻香，触摸等
1155	2	女	老年人	结伴出行	无限制	下午13:00-18:00	IV 在花园短暂停留，四处观望，闻香，触摸等
1156	8┋9	男	老年人	结伴出行	无限制	下午13:00-18:00	III 有进入花园的意图，但只是认为比较安静，休憩聊天
1157	11	男	成年人	结伴出行	无限制	下午13:00-18:00	I 用最短路径穿过花园，没有视线交流
1158	11	男	成年人	结伴出行	无限制	下午13:00-18:00	I 用最短路径穿过花园，没有视线交流
1159	11	男	成年人	结伴出行	无限制	下午13:00-18:00	I 用最短路径穿过花园，没有视线交流
1160	6┋7┋8	女	成年人	结伴出行	无限制	下午13:00-18:00	I 用最短路径穿过花园，没有视线交流
1161	6┋7┋8	男	成年人	结伴出行	无限制	下午13:00-18:00	II 散步等，没有与花园设施接触
1162	4┋16	女	成年人	结伴出行	无限制	下午13:00-18:00	IV 在花园短暂停留，四处观望，闻香，触摸等
1163	3┋16	男	成年人	结伴出行	无限制	下午13:00-18:00	III 有进入花园的意图，但只是认为比较安静，休憩聊天
1164	2┋16	女	成年人	结伴出行	无限制	下午13:00-18:00	IV 在花园短暂停留，四处观望，闻香，触摸等
1165	3┋16	男	成年人	结伴出行	无限制	下午13:00-18:00	V 与花园保持一段时间的接触，锻炼，通过每一处设施，敲击感官设施等行为
1166	6┋7┋8	男	成年人	结伴出行	无限制	下午13:00-18:00	II 散步等，没有与花园设施接触
1167	6┋7┋8┋9	女	成年人	结伴出行	无限制	下午13:00-18:00	II 散步等，没有与花园设施接触
